# Supplementary material for: Divergent kleisin subunits of cohesin specify mechanisms to tether and release meiotic chromosomes
Source: eLife journal article supplement (doi:10.7554/elife.03467), 2014-08-29
Supplement: figures [file elife-03467-figures-v2.pdf]

---

## Figures and figure supplements

Divergent kleisin subunits of cohesin specify mechanisms to tether and release meiotic chromosomes

**Aaron F Severson, Barbara J Meyer**

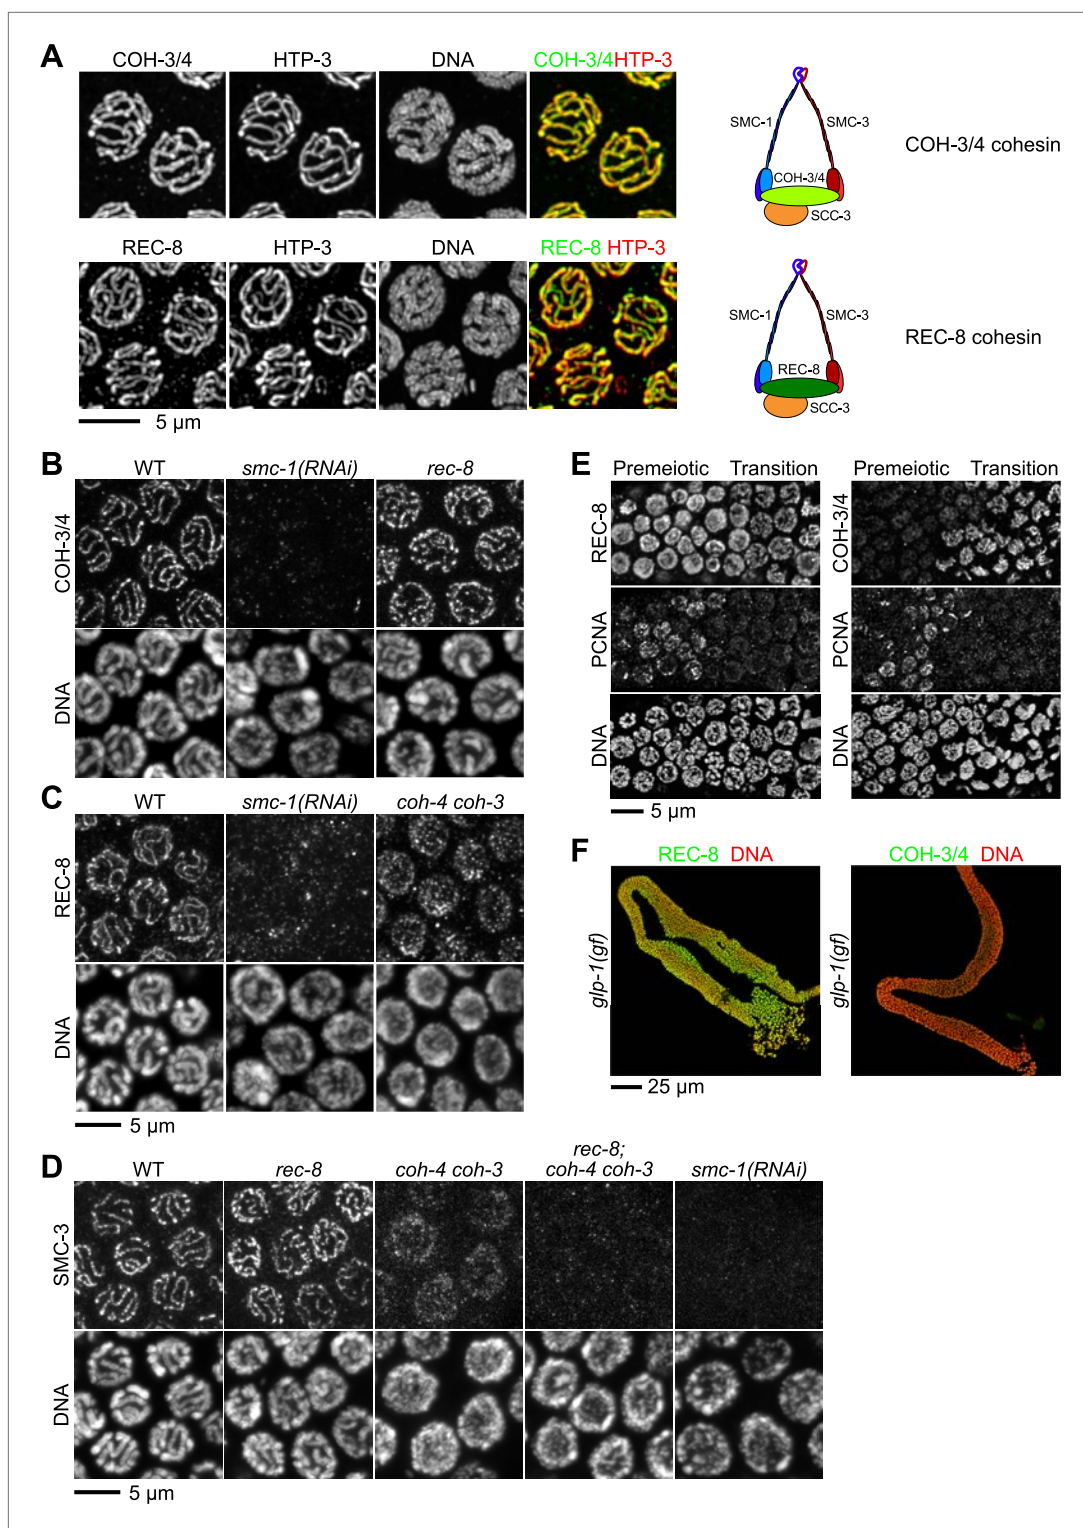

**Figure 1.** Multiple cohesin complexes that differ in their kleisin subunit bind to *C. elegans* meiotic chromosomes. Interdependent loading of REC-8 and COH-3/4 with cohesin SMC proteins is demonstrated. Shown are Z-projected confocal sections through pachytene nuclei (**A–D**), the distal region of the gonad (**E**), and entire dissected gonads (**F**). (**A**) The predicted  $\alpha$ -kleisins REC-8 and COH-3/4 are present along synapsed homologs in pachytene nuclei of wild-type animals and co-localize with the axis protein HTP-3, as expected for meiotic kleisins. COH-3/4 (**B**) and REC-8 (**C**) both require SMC-1 for their association with meiotic chromosomes but bind

Figure 1. Continued on next page

## Figure 1. Continued

chromosomes independently. **(D)** SMC-3 associates with chromosomes of *rec-8* and *coh-4 coh-3* mutants, but SMC-3 staining is undetectable in kleisin triple mutants and *smc-1(RNAi)* animals. **(E)** The distal region of the gonad holds nuclei undergoing mitotic proliferation and premeiotic DNA replication (Premeiotic Zone) and nuclei that have entered prophase of meiosis I (Transition Zone). REC-8 is strongly expressed in all germline nuclei, including S phase nuclei, which express GFP::PCN-1. In contrast, COH-3/4 staining is undetectable in GFP::PCN-1 positive nuclei and first appears on meiotic chromosomes in the transition zone, indicating that COH-3/4 cohesin becomes cohesive independently of DNA replication. **(F)** *glp-1(gf)* mutations prevent initiation of meiosis; consequently, the gonad fills with mitotically proliferating germ cell nuclei. Robust expression of REC-8, but not COH-3/4, is detected in the mitotic nuclei of *glp-1(gf)* worms, indicating that COH-3/4 is first expressed during meiosis.

DOI: [10.7554/eLife.03467.003](https://doi.org/10.7554/eLife.03467.003)

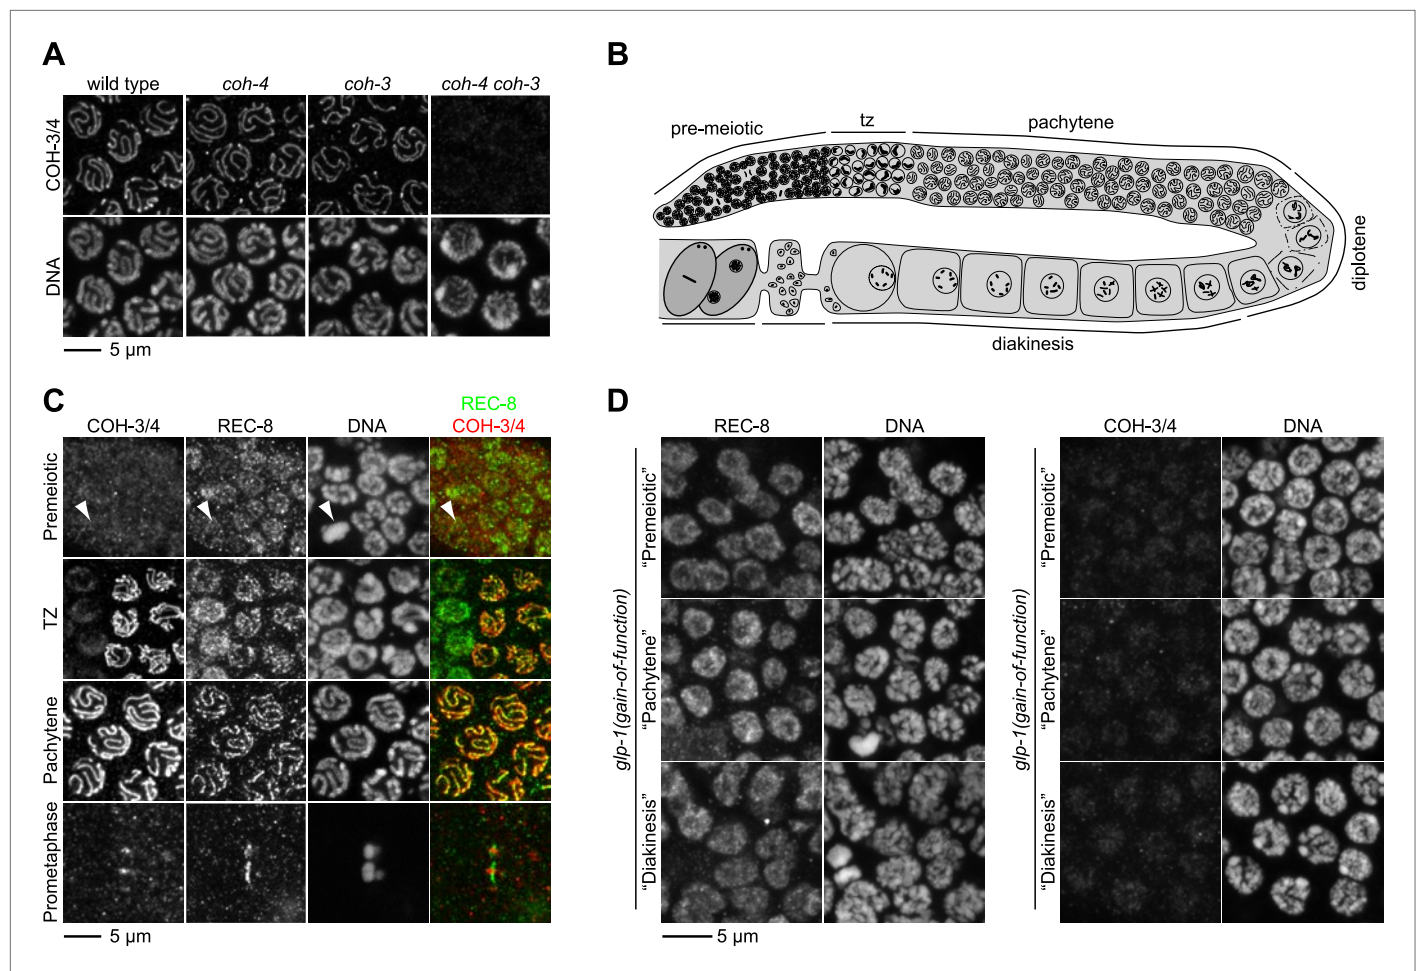

**Figure 1—figure supplement 1.** REC-8 accumulates in hermaphrodite gonads prior to the initiation of meiosis, while COH-3/4 becomes detectable only in meiotic nuclei. **(A)** Rabbit polyclonal antibodies recognize both COH-3 and COH-4. COH-3/4 antibodies label meiotic chromosomes in wild-type animals as well as *coh-3* and *coh-4* single mutants. Antibody staining is undetectable only in *coh-4 coh-3* double mutants. **(B)** Cartoon showing that premeiotic nuclei and nuclei in various stages of meiosis occupy distinct, predictable regions of the gonad in wild-type animals. **(C)** Confocal micrographs of germline nuclei stained with DAPI and antibodies to REC-8 and COH-3/4. COH-3/4 are undetectable in the distal-most region of the gonad, which contains mitotically-cycling germline stem cells and nuclei in premeiotic S phase. Arrowheads indicate a metaphase figure. COH-3/4 appear abruptly on chromosomes at the onset of meiotic prophase (transition zone, TZ), and COH-3/4 are detected along the entire chromosomal axis in pachytene. By prometaphase of meiosis I, COH-3/4 are detected only at the short arm. The pattern of COH-3/4 localization differs from that of REC-8 in two important ways. First, REC-8 is expressed in premeiotic nuclei, although it is unclear whether REC-8 is bound to chromosomes at this stage. Second, while COH-3/4 become restricted to the short arm by prometaphase I, REC-8 is removed from the short arm but persists at the long arm. **(D)** Gain-of-function alleles of *glp-1* prevent initiation of meiosis, and consequently, the germline fills with mitotically proliferating nuclei. High magnification confocal images of regions of the gonad that would contain premeiotic, pachytene, or diakinesis nuclei in wild-type animals are shown. REC-8 is highly expressed in all of these nuclei, but COH-3/4 are not.

DOI: [10.7554/eLife.03467.004](https://doi.org/10.7554/eLife.03467.004)

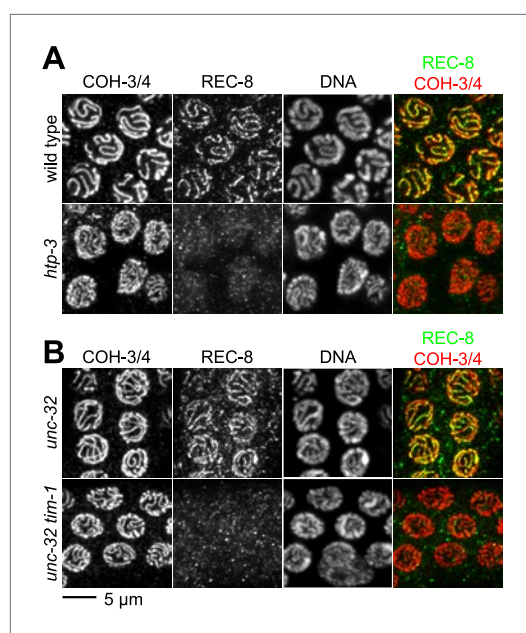

**Figure 2.** The kleisin subunit determines mechanisms of cohesin loading. Confocal micrographs of pachytene nuclei reveal that the axial element protein HTP-3 (**A**) and the Timeless ortholog TIM-1 (**B**) are both essential for REC-8 cohesin loading, but neither protein is needed for COH-3/4 cohesin loading.

DOI: [10.7554/eLife.03467.005](https://doi.org/10.7554/eLife.03467.005)

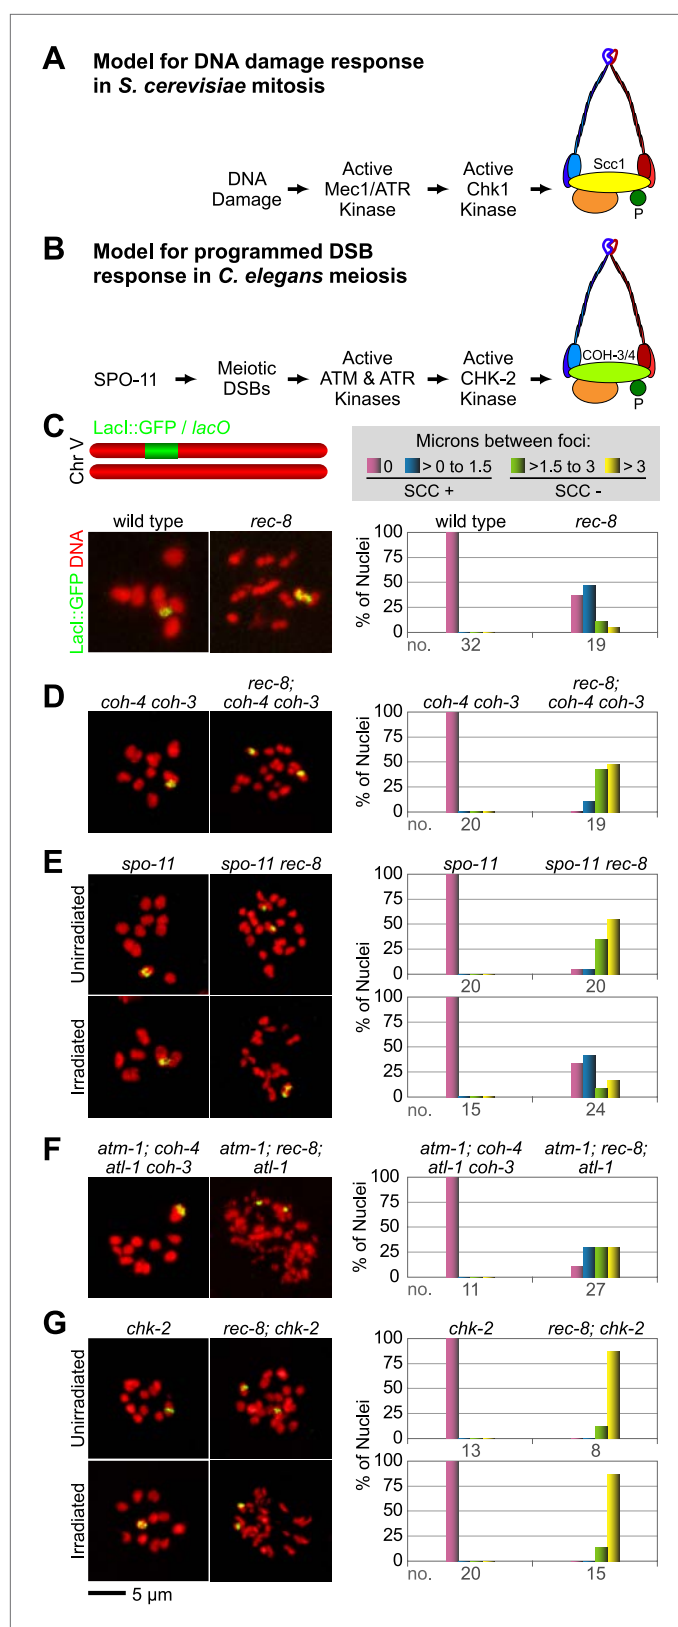

**Figure 3.** A conserved mechanism initiates SCC in response to programmed DSBs in *C. elegans* meiosis and exogenous DNA breaks in budding yeast mitosis. **(A)** In *S. cerevisiae*, DNA damage in G2/M activates ATR and Chk1, resulting in Scc1 phosphorylation and SCC establishment. **(B)** A model for SCC establishment by COH-3/4

Figure 3. Continued on next page

Figure 3. Continued

cohesin. DSBs created by SPO-11 activate ATM/ATR and CHK-2, leading to COH-3/4 phosphorylation and generation of SCC. (C–G) Data supporting the model in (B). Images on the left show projected Z-sections through entire diakinesis nuclei stained with LacI::GFP (green) and DAPI (red). LacI::GFP bound to a heterozygous *lacO* array integrated into chromosome V reveals whether sisters are held together by SCC. Charts on the right show quantification of distances between LacI::GFP foci. 0  $\mu$ m indicates that discrete GFP foci could not be resolved. no. = number of nuclei scored. (C) LacI::GFP labels a single bivalent in wild-type animals, and the two sisters of a single univalent in *rec-8* mutants. (D) Sister chromatids are held together by REC-8-dependent SCC in *coh-4 coh-3* double mutants, but are apart in kleisin triple mutants. (E) Sister chromatids are held together by SCC in *spo-11* mutants, but not in *spo-11 rec-8* mutants. DSBs induced by  $\gamma$ -irradiation restore SCC in *spo-11 rec-8* mutants. (F) Sisters are apart and extensive chromosomal fragmentation and rearrangement occurs in *atm-1; rec-8; atl-1* animals, but not in *atm-1; coh-4 atl-1 coh-3* mutants. (G) Cohesion between sisters is not established in *rec-8; chk-2* mutants. Irradiation of *rec-8; chk-2* mutants does not restore SCC but does induce chromosome fragmentation and rearrangement, demonstrating a role for CHK-2 in SCC establishment that is downstream of DSB formation. CHK-1 is not required for COH-3/4-dependent SCC (Figure 3—figure supplement 3B).

DOI: 10.7554/eLife.03467.006

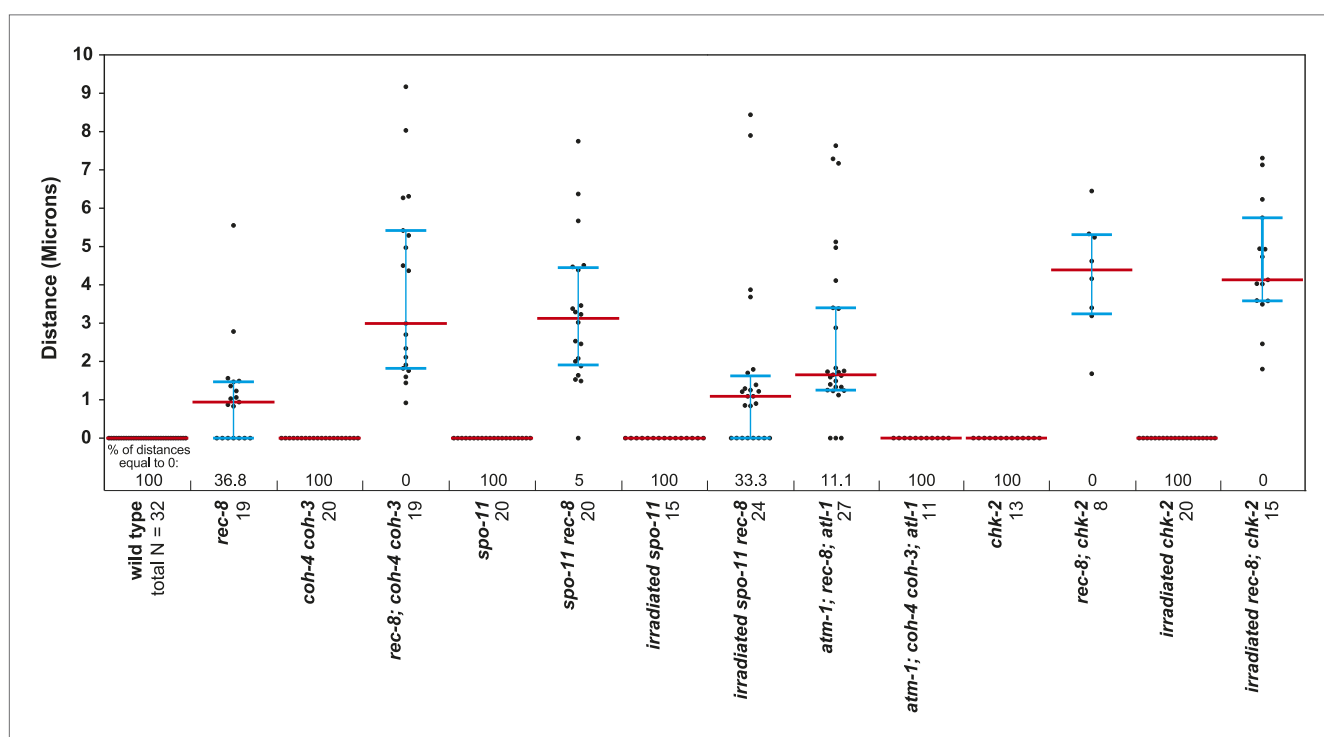

**Figure 3—figure supplement 1.** Beeswarm plots show individual distances between LacI::GFP foci in diakinesis nuclei. Red horizontal lines indicate the median, and blue horizontal lines indicate the interquartile range. A distance of >1.5 microns indicates defective SCC.

DOI: 10.7554/eLife.03467.007

| Genotype 1                | vs. | Genotype 2                       | p (Two-tailed Mann-Whitney) |
|---------------------------|-----|----------------------------------|-----------------------------|
| <i>rec-8</i>              |     | <i>rec-8; coh-4 coh-3</i>        | <0.001                      |
|                           |     | <i>spo-11 rec-8</i>              | <0.001                      |
|                           |     | <i>irradiated spo-11 rec-8</i>   | 0.620                       |
|                           |     | <i>atm-1; rec-8; atl-1</i>       | 0.001                       |
|                           |     | <i>rec-8; chk-2</i>              | <0.001                      |
|                           |     | <i>irradiated rec-8; chk-2</i>   | <0.001                      |
| <i>rec-8; coh-4 coh-3</i> |     | <i>spo-11 rec-8</i>              | 0.646                       |
|                           |     | <i>scc-1; rec-8; coh-4 coh-3</i> | 0.099                       |

**Figure 3—figure supplement 2.** Table of significance values for distances between LacI::GFP foci in diakinesis nuclei.  
DOI: 10.7554/eLife.03467.008

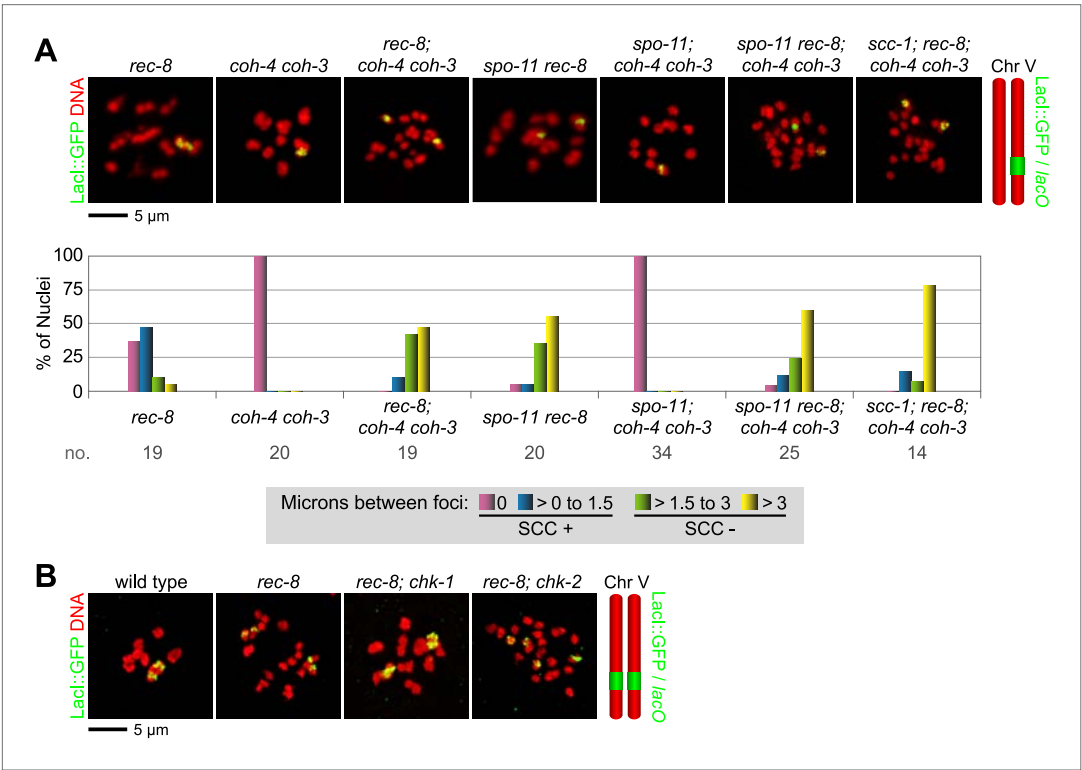

**Figure 3—figure supplement 3.** REC-8 and COH-3/4 cohesin tether SCC by different mechanisms. Shown are projected confocal images of entire diakinesis nuclei stained with DAPI (red) and LacI::GFP (green). SCC was assessed by the distribution of LacI::GFP bound to a *lacO* array integrated into one (A) or both (B) chromosome V homologs. Bar charts show quantification of distances between LacI::GFP foci. 0 μm indicates that discrete GFP foci could not be resolved. no. = number of nuclei scored. (A) SPO-11-dependent DSBs trigger SCC mediated by COH-3/4 but not REC-8 cohesin. In *rec-8* single mutants, the sister chromatids of each homolog are tethered together by COH-3/4-dependent SCC. Similarly, sisters are held together by REC-8-dependent SCC in *coh-4 coh-3* double mutants. Sisters are detached in diakinesis nuclei of *spo-11 rec-8* double mutants, *rec-8; coh-4 coh-3* triple mutants, and *spo-11 rec-8; coh-4 coh-3* quadruple mutant animals, and the frequency of detachment and the distance between sisters are similar in all three genotypes. In contrast, disrupting SPO-11 function in *coh-4 coh-3* double mutants does not lead to cohesion defects. (B) COH-3/4-dependent SCC requires CHK-2, but not CHK-1. Diakinesis nuclei of *rec-8; chk-1(RNAi)* animals resemble those of *rec-8* single mutants, while sisters are detached in diakinesis nuclei of *rec-8; chk-2(RNAi)* worms. Thus, CHK-2, but not CHK-1, is required for the establishment of COH-3/4 dependent SCC.  
DOI: 10.7554/eLife.03467.009

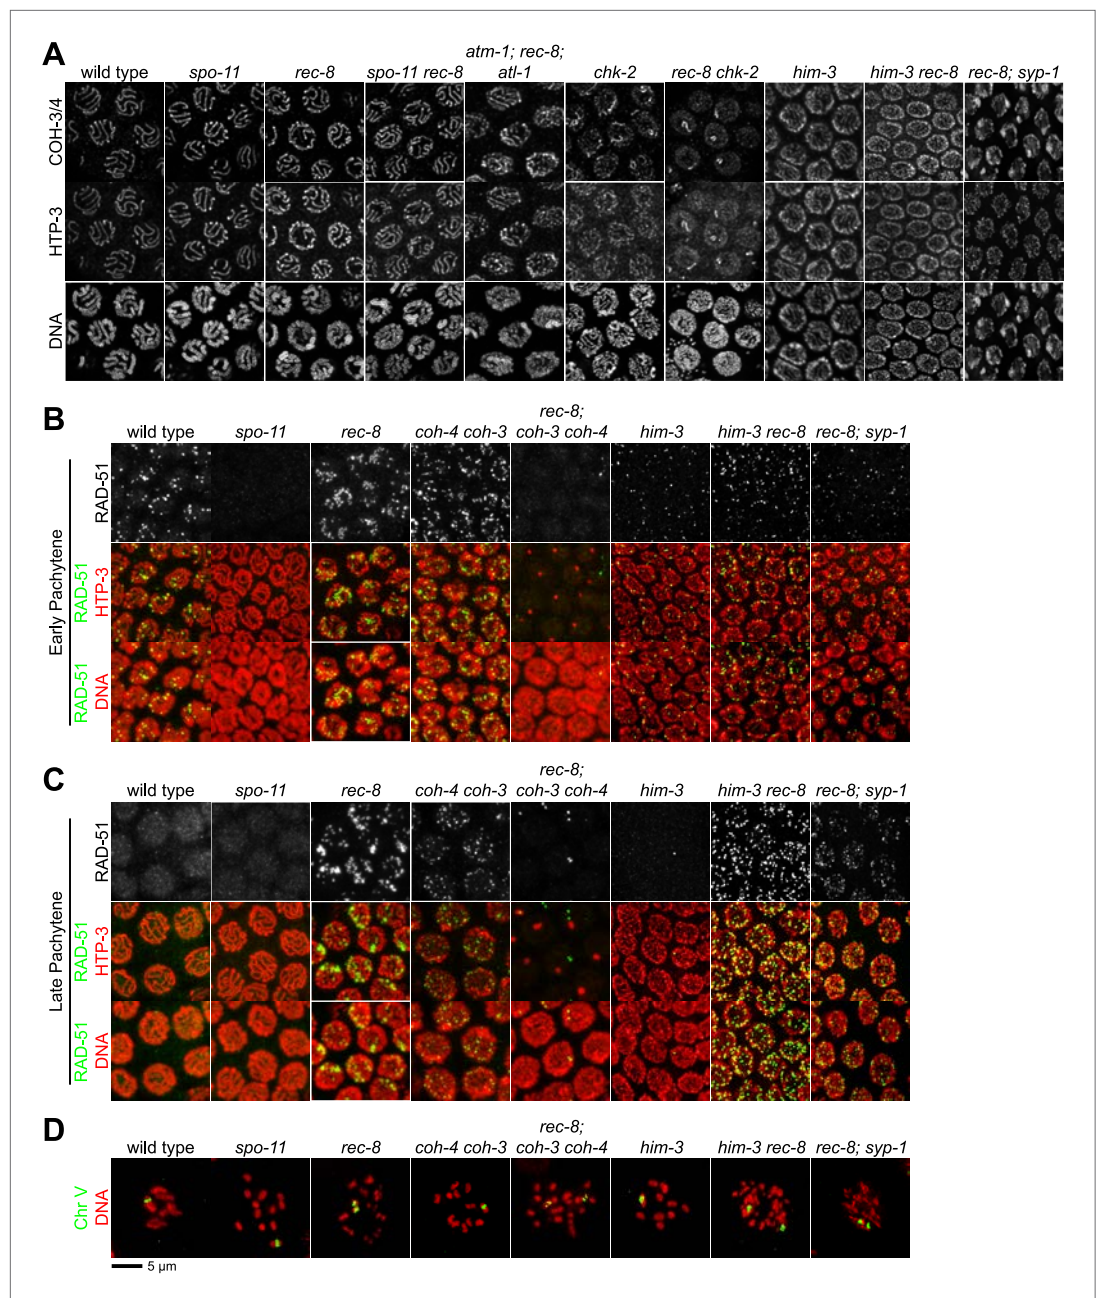

**Figure 4.** Analysis of COH-3/4 cohesin loading and DSB formation and repair in SCC-defective worms. **(A)** Imaging of pachytene nuclei stained with antibodies to COH-3/4 and HTP-3 demonstrated that COH-3/4 associates with meiotic axes in most mutants that fail to establish COH-3/4-dependent SCC. Although COH-3/4 associates with chromosomes of *him-3 rec-8* animals, the intensity of COH-3/4 signal is less than that detected in *him-3* single mutants, which, in turn, is less than that in wild-type animals (See also **Figure 4—figure supplement 2**). A reduction in signal is also true of DAPI and HTP-3, which loads onto chromosomes independently of HIM-3 (Goodyer et al., 2008; Severson et al., 2009). Thus, the strong staining of COH-3/4 and HTP-3 observed in wild-type nuclei likely results from the close association of the four chromatid axes via synapsis and SCC, while the reduced staining in *him-3* mutants likely results from homolog separation due to defective synapsis, and in *him-3 rec-8* mutants from homolog and sister separation due to defective synapsis and SCC. Consistent with this model, a similar reduction in the intensity of COH-3/4 and HTP-3 staining was detected in *rec-8* animals also lacking the CR protein SYP-1, which is dispensable for chromosomal loading of all known AE proteins (MacQueen et al., 2002; AFS unpublished data). **(B and C)** Confocal images of early **(B)** and late **(C)** pachytene nuclei stained with DAPI (red) and antibodies to DSB marker RAD-51 (green). Abundant RAD-51 foci are detected in *him-3 rec-8* and *rec-8; syp-1* **Figure 4. Continued on next page**

Figure 4. Continued

mutants, indicating that DSBs are formed. RAD-51 staining persists abnormally late in these mutants, and chromosomal fragmentation and fusions are evident in diakinesis nuclei (**D**) stained with DAPI (red) and LacI::GFP (green) as in **Figure 3C**. Thus, establishment of COH-3/4-dependent SCC is essential for homology-directed DSB repair in animals homozygous for a *rec-8* deletion. Remarkably, such rearrangements are not detected in kleisin triple mutants. Explaining this finding, few RAD-51 foci form in kleisin triple mutants. Those that do appear in late pachytene, well after DSBs are repaired in wild-type animals.

DOI: [10.7554/eLife.03467.010](https://doi.org/10.7554/eLife.03467.010)

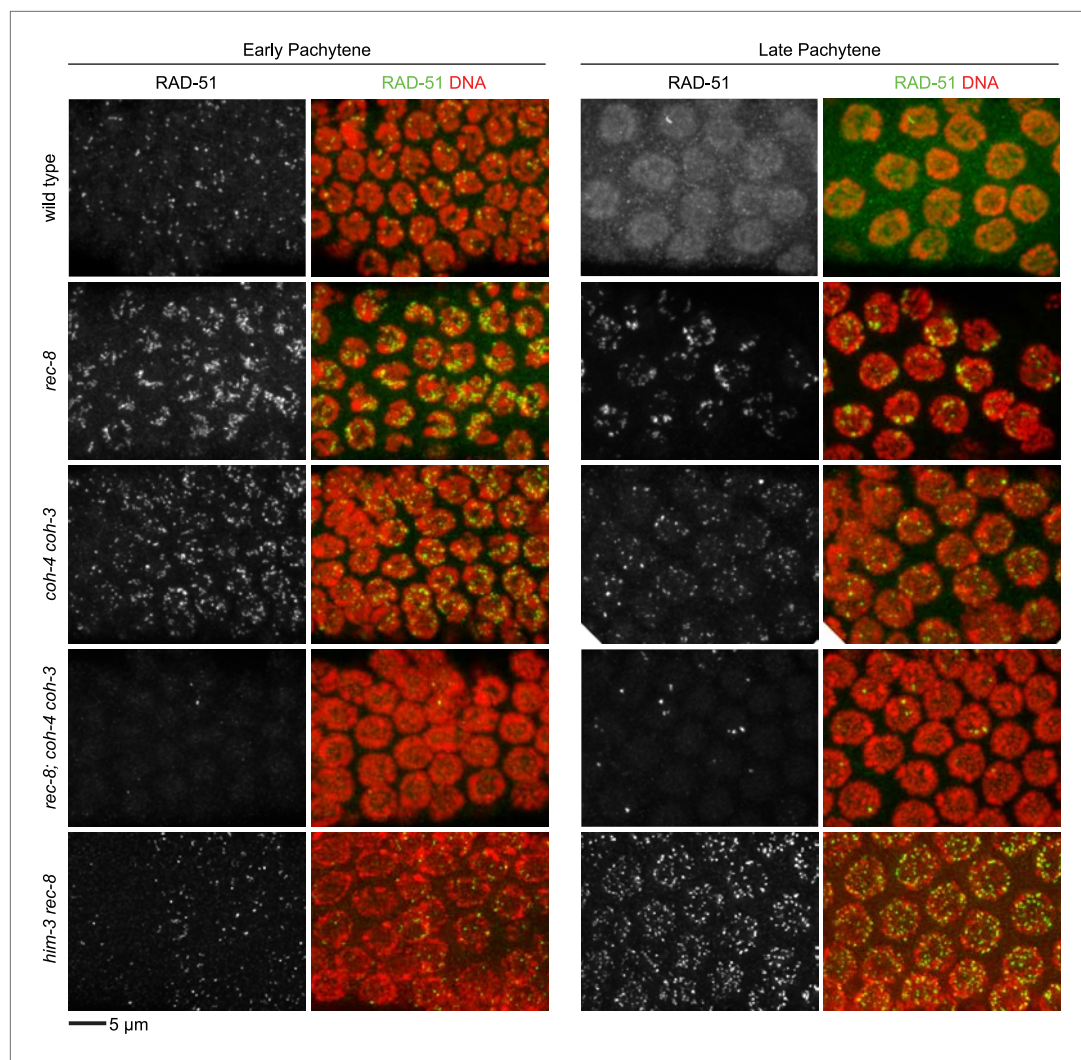

**Figure 4—figure supplement 1.** Enlargements of early and late pachytene nuclei of wild-type and mutant animals stained with RAD-51 antibodies. Abundant RAD-51 foci are present in nuclei of all genotypes, except in *rec-8*; *coh-4 coh-3* mutants, which have a severely reduced number of foci. RAD-51 foci are very rarely present in early pachytene nuclei, and occasional foci appear in late pachytene nuclei.

DOI: [10.7554/eLife.03467.011](https://doi.org/10.7554/eLife.03467.011)

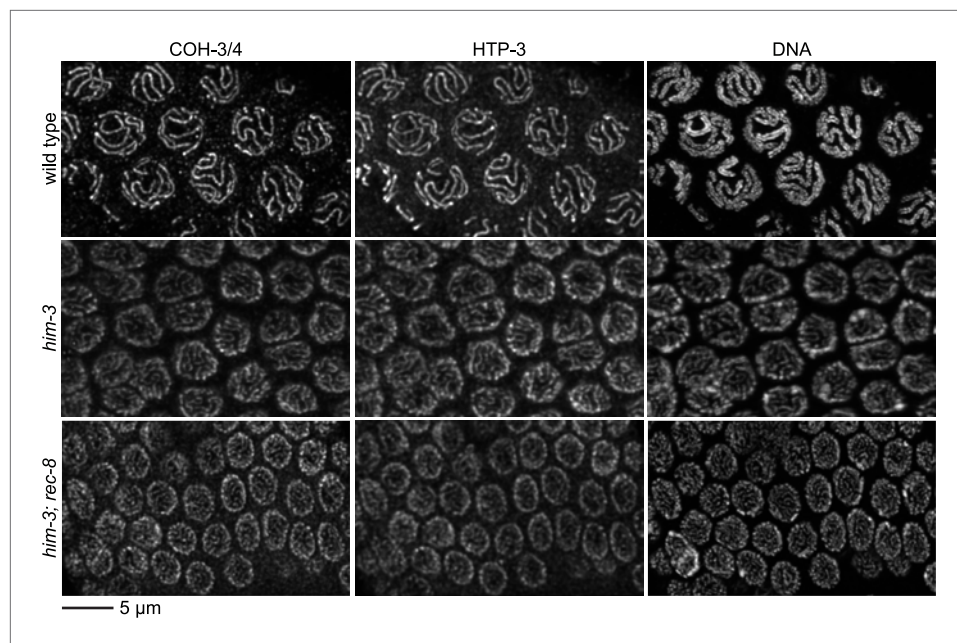

**Figure 4—figure supplement 2.** Enlargements of pachytene nuclei from wild-type animals and *him-3* or *him-3; rec-8* mutants stained with DAPI and antibodies to COH-3/4, HTP-3. COH-3/4 and HTP-3 associate with pachytene chromosomes but the levels are reduced in mutants relative to wild-type animals, likely reflecting a failure of homolog synapsis in *him-3* single mutants and defective synapsis and SCC in *him-3 rec-8* mutants.

DOI: [10.7554/eLife.03467.012](https://doi.org/10.7554/eLife.03467.012)

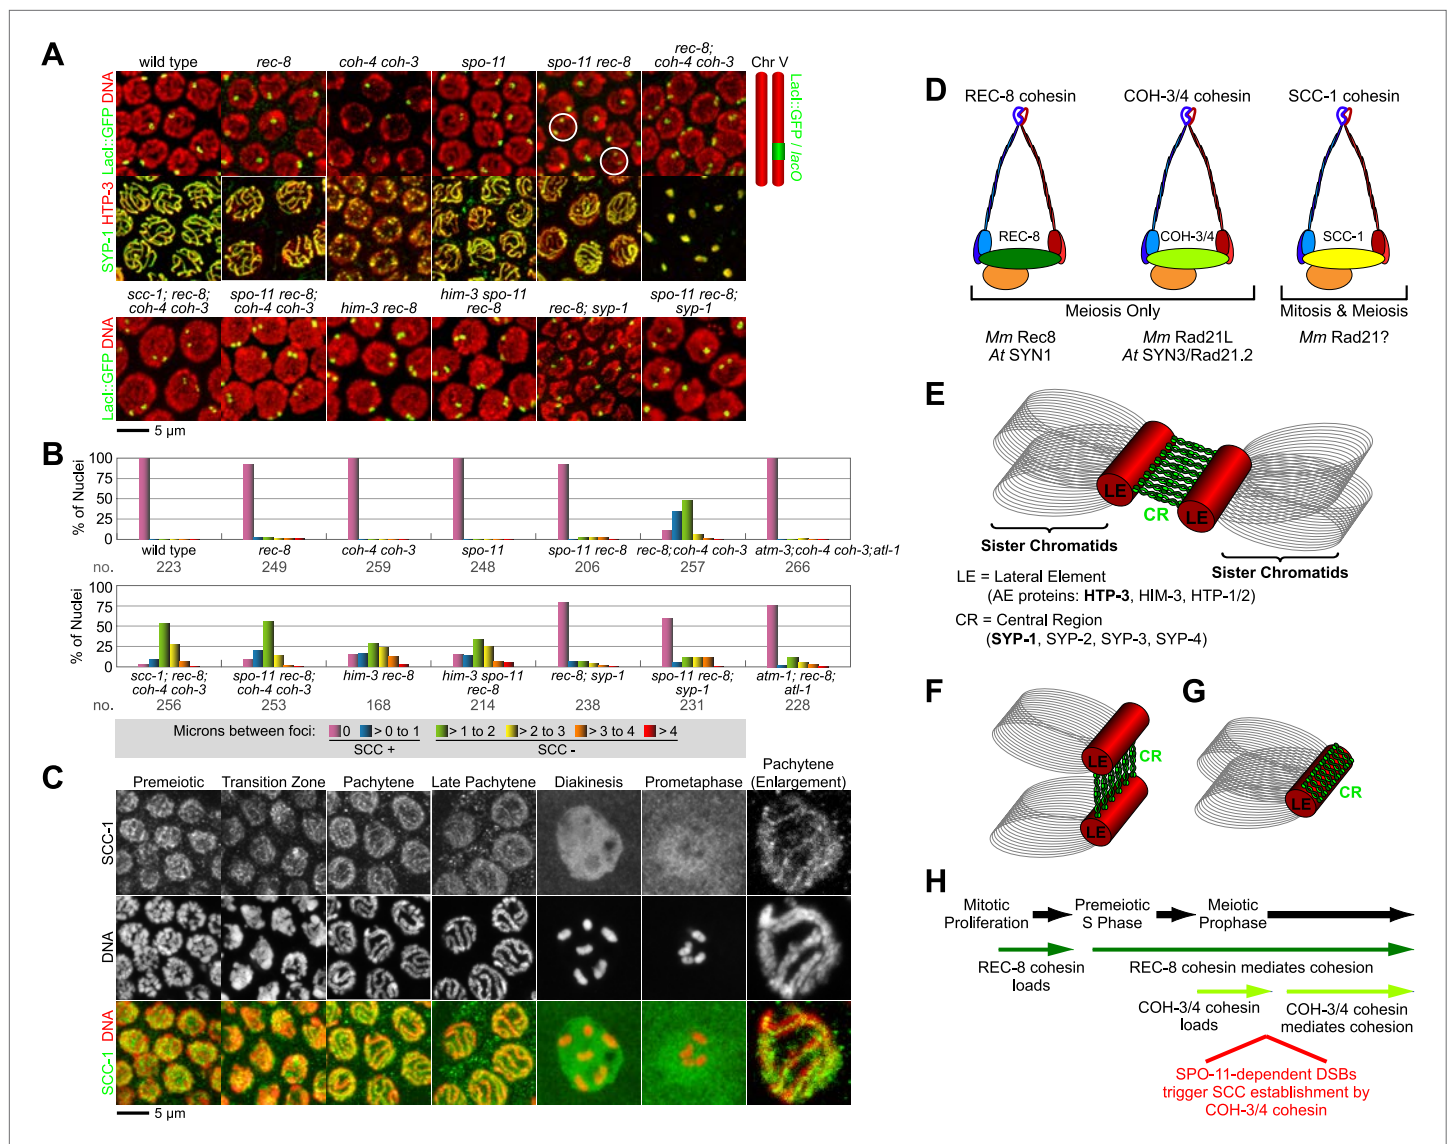

**Figure 5.** Cohesin-dependent and cohesin-independent SCC holds sisters together in pachytene nuclei. **(A)** Projections of confocal Z-sections through entire pachytene nuclei. A single LacI::GFP focus is detected in pachytene nuclei of wild-type, *coh-4 coh-3*, and *spo-11* mutant worms, indicating that sister chromatids are tethered by SCC. In contrast, sisters are separated in most pachytene nuclei of kleisin triple mutants but still remain close together, suggesting that residual SCC persists. Partial depletion of SCC-1 in kleisin triple mutant animals increases both the frequency of sister separation and the distance between sisters, demonstrating a meiotic role for SCC-1. Surprisingly, sisters could be resolved in only ~10% of nuclei in *rec-8* and *spo-11 rec-8* worms (white circles). The robust synaptonemal complex (SC) assembly in *spo-11 rec-8* worms suggested that SC proteins may tether sister chromatids independently of cohesin. Indeed, disrupting the axial element (AE) protein HIM-3 severely compromised SCC in both *rec-8* and *spo-11 rec-8* mutants. Disrupting the central region (CR) protein SYP-1 had a lesser effect, suggesting that AE proteins can tether sisters together independently of CR proteins and cohesin. **(B)** Quantification of sister separation in pachytene nuclei. no. = number of nuclei scored. **(C)** Z-projected confocal images of wild-type gonads stained with DAPI and antibodies to SCC-1. Similar to REC-8, SCC-1 was detected in premeiotic nuclei and became enriched in axial structures of transition zone and pachytene nuclei. Nucleoplasmic staining obscured any chromosomal signal from pachytene exit until prometaphase; however, SCC-1 was undetectable following nuclear envelope breakdown in prometaphase, indicating that SCC-1 cohesin was removed from chromosomes during diplotene or diakinesis. **(D)** Similar sets of kleisins function during meiosis in *C. elegans*, mammals and plants. **(E)** A schematic of SC structure. Studies in worms have identified four components of the axial/lateral element, or LE (HTP-3, HIM-3, and the functionally redundant proteins HTP-1 and HTP-2) and four components of the CR (SYP-1, SYP-2, SYP-3, and SYP-4). **(F and G)** Two models of SC-dependent linkages between sisters. **(F)** CR proteins link AEs formed along each sister. **(G)** AE proteins hold sisters together independently of CRs. **(H)** REC-8 cohesin and COH-3/4 cohesin load onto chromosomes at different times and establish SCC by different mechanisms.

DOI: 10.7554/eLife.03467.013

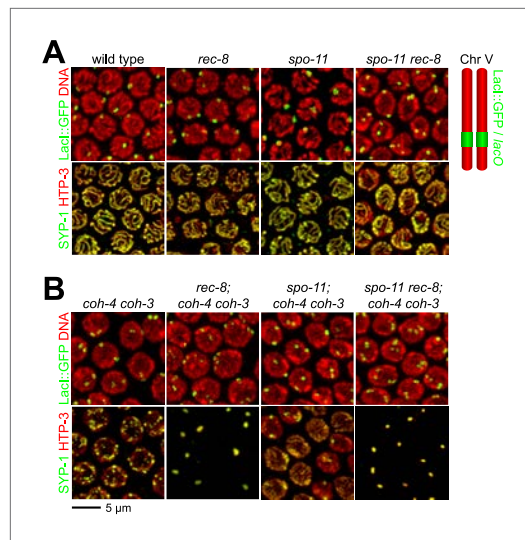

**Figure 5—figure supplement 1.** Synaptonemal complex (SC) proteins associate with pachytene chromosomes in *rec-8* and *spo-11 rec-8* animals, but they do not tether homologous chromosomes. Shown are confocal images of nuclei stained with LacI::GFP, which labels *lacO* arrays integrated into both chromosome V homologs (top panels) and antibodies to the axial/lateral element protein HTP-3 and the central region protein SYP-1 (bottom panels) (**A**) SC proteins associate with pachytene chromosomes of wild-type animals, *rec-8* and *spo-11* single mutants, and *spo-11 rec-8* double mutants. A single focus of LacI::GFP was detected in pachytene nuclei of wild-type and *spo-11* worms, as expected since homologs are fully synapsed in these animals. In contrast, two widely separated GFP foci were detected in *rec-8* and *spo-11 rec-8* mutants, suggesting that synapsis occurs between non-homologous chromosomes or sister chromatids rather than homologs. (**B**) SC proteins form polycomplexes in pachytene nuclei of *rec-8; coh-4 coh-3* triple mutants and *spo-11 rec-8; coh-4 coh-3* quadruple mutants. 3–4 LacI::GFP foci can be detected in most nuclei of these animals, consistent with a role for SC proteins in cohesin-independent SCC.

DOI: [10.7554/eLife.03467.014](https://doi.org/10.7554/eLife.03467.014)

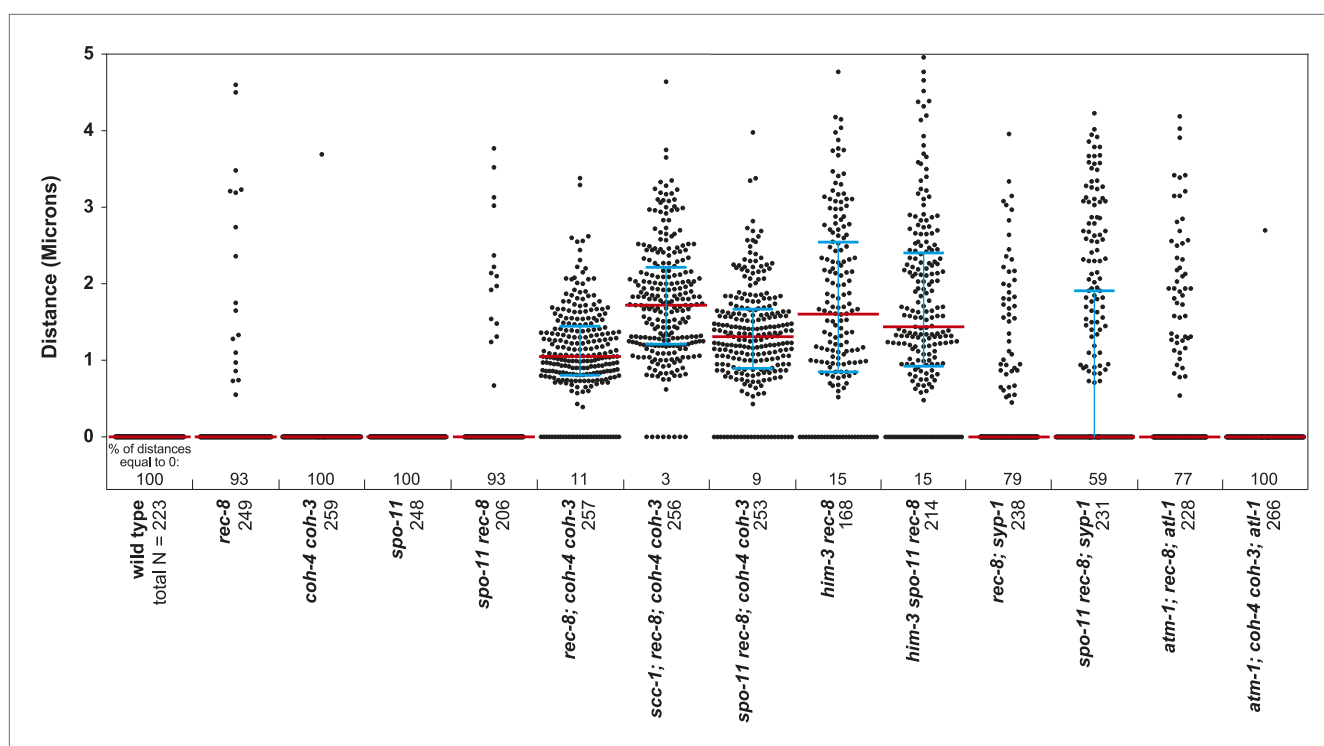

**Figure 5—figure supplement 2.** Beeswarm plots show individual distances between LacI::GFP foci in pachytene nuclei. Red horizontal lines indicate the median, and blue horizontal lines indicate the interquartile range. A distance of >1 micron indicates defective SCC.

DOI: [10.7554/eLife.03467.015](https://doi.org/10.7554/eLife.03467.015)

| Genotype 1          | vs. | Genotype 2                | p (Two-tailed Mann-Whitney) |
|---------------------|-----|---------------------------|-----------------------------|
| rec-8               |     | spo-11 rec-8              | 0.986                       |
|                     |     | rec-8; coh-4 coh-3        | <0.001                      |
|                     |     | him-3 rec-8               | <0.001                      |
|                     |     | rec-8; syp-1              | 0.012                       |
|                     |     | spo-11 rec-8; syp-1       | <0.001                      |
|                     |     | atm-1; rec-8; atl-1       | <0.002                      |
| rec-8; coh-4 coh-3  |     | scc-1; rec-8; coh-4 coh-3 | <0.001                      |
|                     |     | spo-11 rec-8; coh-4 coh-3 | <0.001                      |
|                     |     | spo-11 rec-8              | <0.001                      |
| him-3 rec-8         |     | him-3 spo-11 rec-8        | 0.861                       |
| rec-8 syp-1         |     | spo-11 rec-8; syp-1       | <0.001                      |
| atm-1; rec-8; atl-1 |     | atm-1; coh-4 coh-3; atl-1 | <0.001                      |

**Figure 5—figure supplement 3.** Table of significance values for distances between LacI::GFP foci in pachytene nuclei.

DOI: [10.7554/eLife.03467.016](https://doi.org/10.7554/eLife.03467.016)

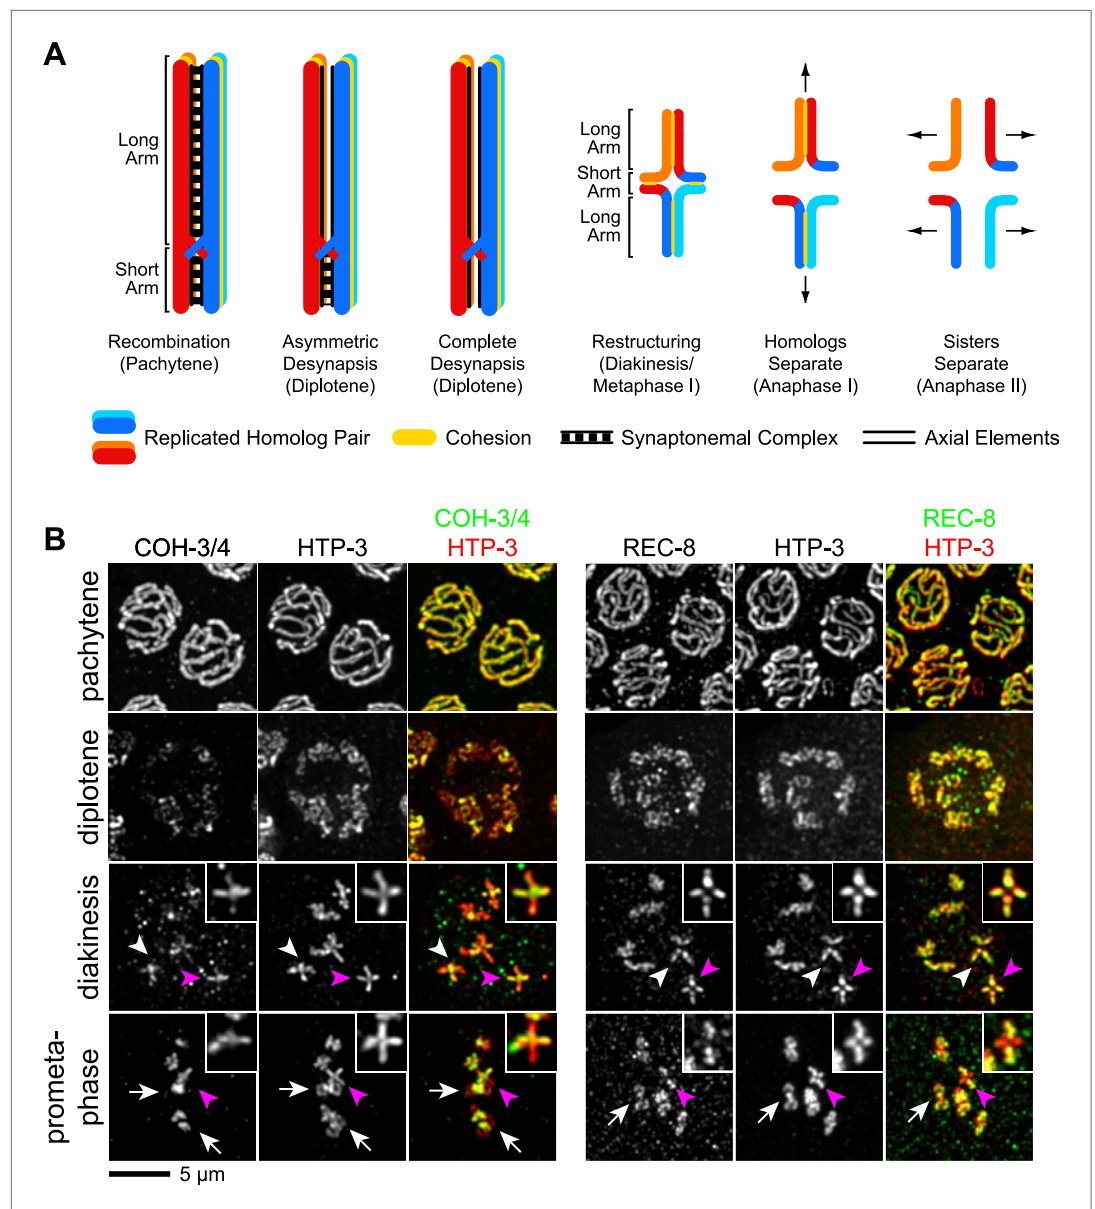

**Figure 6.** CO recombination triggers removal of REC-8 and COH-3/4 cohesins from reciprocal domains in late prophase/prometaphase of meiosis I. **(A)** In worms, CO position determines where SCC will be removed in anaphase I. A single, asymmetrically positioned CO forms between each homolog pair in pachytene, dividing the homologs into long and short arms. In diplotene, each homolog pair is restructured around the CO to form a cruciform bivalent. At anaphase I, SCC is released at the short arm to allow homologs to separate. SCC persists at the long arm until anaphase II. **(B)** Confocal micrographs showing that REC-8 and COH-3/4 adopt complementary patterns on meiotic chromosomes by metaphase. In pachytene, REC-8 and COH-3/4 overlap with HTP-3 along the entire meiotic axis. In diplotene, HTP-3 and REC-8 persist along the length of the axis, but COH-3/4 staining diminishes at long arms. By diakinesis, COH-3/4 levels are substantially reduced at long arms but not at short arms. In contrast, REC-8 levels usually remain equal at long and short arms until late diakinesis or prometaphase. Diakinesis nuclei shown are from the third oldest oocyte. In prometaphase/metaphase I, REC-8 and COH-3/4 occupy reciprocal domains. REC-8 is reduced or undetectable at short arms, while COH-3/4 is detectable only at short arms. Arrowheads indicate bivalents viewed from the 'front', that is with both long and short arms in the image plane. In these bivalents, HTP-3 staining is cruciform and long and short arms can usually be distinguished by their relative lengths. Pink arrowheads indicate the bivalent shown at higher magnification in the inset. Arrows indicate bivalents viewed from the 'side', that is with short arms perpendicular to the image plane. In these bivalents, HTP-3 staining resembles a 'figure 8', with two loops of uniform staining (the long arms) meeting at a region of more intense staining (the short arms).

DOI: [10.7554/eLife.03467.017](https://doi.org/10.7554/eLife.03467.017)

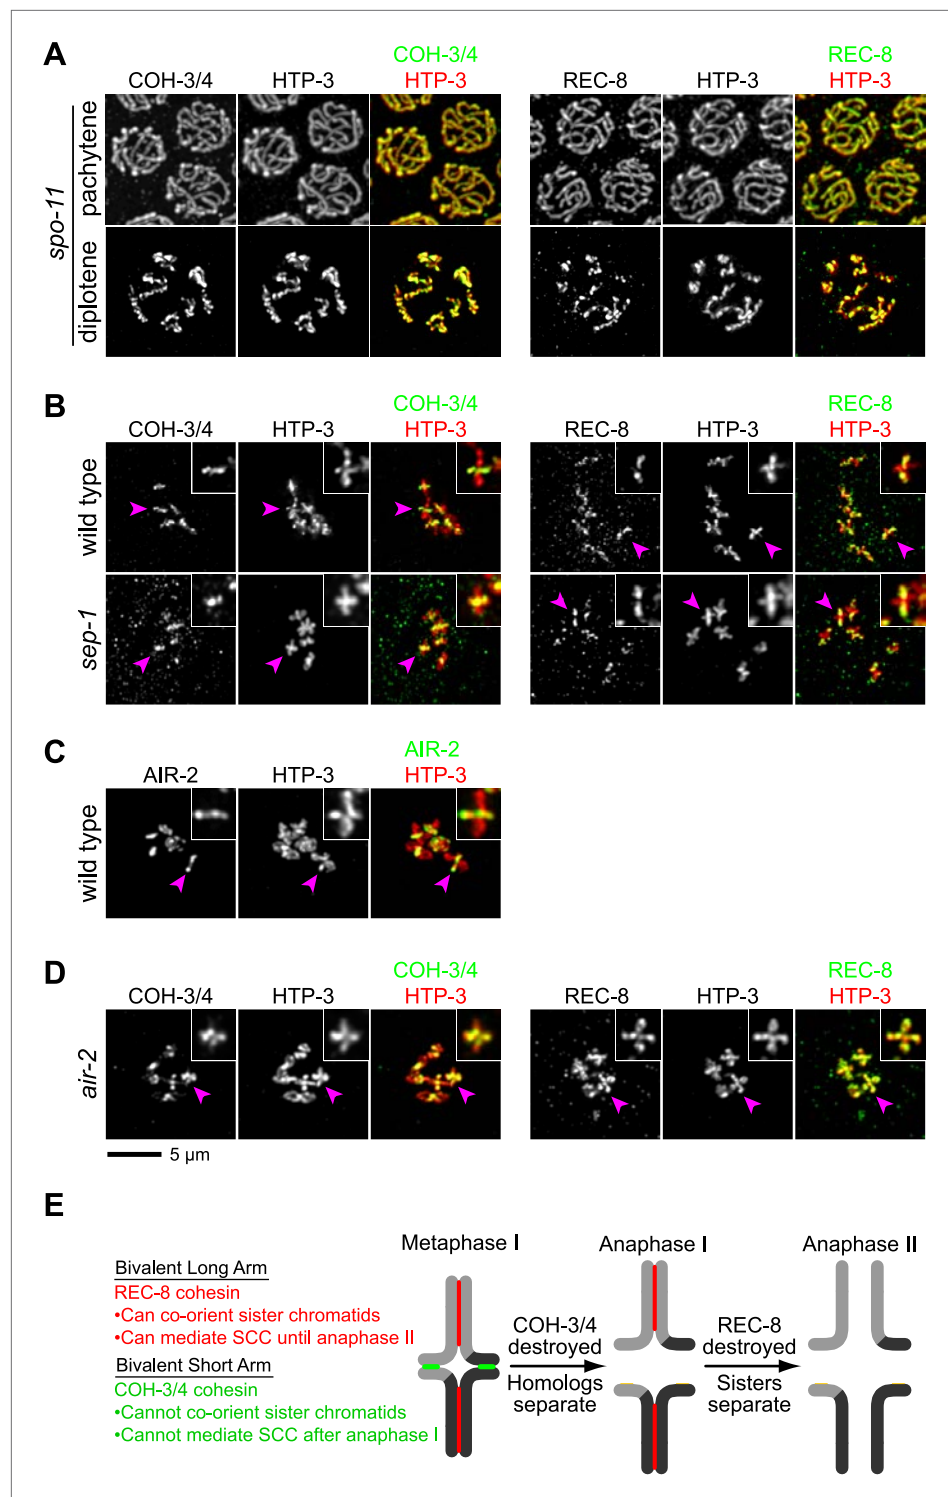

**Figure 7.** CO recombination triggers separate-independent removal of REC-8 and COH-3/4 from complementary chromosomal territories. (A–D) Projected images of entire nuclei in pachytene and diplotene (A) or diakinesis (B–D). (A) In *spo-11* mutants, CO recombination fails and REC-8 and COH-3/4 are present along the length of meiotic axes in pachytene and diplotene nuclei. In diakinesis, both kleisins are detected at the mid-univalent (Figure 7—figure supplement 1). (B) Depletion of the separase ortholog *sep-1* does not impede removal of REC-8 or COH-3/4. (C) AIR-2 associates with short arms of diakinesis bivalents. (D) In *air-2(RNAi)* animals, REC-8 persists on both long and short arms of prometaphase bivalents, indicating that AIR-2 is required for removal of Figure 7. Continued on next page

*Figure 7. Continued*

REC-8 from short arms. COH-3/4 still persists at the midbivalent, indicating that AIR-2 is not required for removal of COH-3/4 from long arms or maintenance of COH-3/4 at short arms. **(E)** A model demonstrating how establishing reciprocal domains of REC-8 cohesin and COH-3/4 cohesin could facilitate sequential separation of homologs and then sisters. REC-8 cohesin (red) can co-orient sister chromatids and mediate SCC that persists until anaphase II. COH-3/4 cohesin (green) cannot. Restricting REC-8 cohesin to long arms would ensure that co-orientation and persistent SCC occur only in this domain. Co-orientation of long arms would ensure that sister chromatids are pulled to the same spindle pole in anaphase I following proteolytic cleavage of COH-3/4. Proteolysis of REC-8 in meiosis II would allow sisters to separate.

DOI: [10.7554/eLife.03467.018](https://doi.org/10.7554/eLife.03467.018)

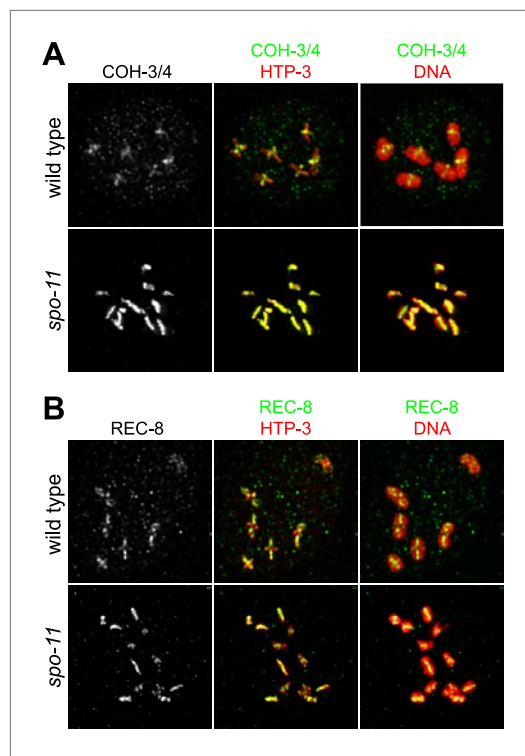

**Figure 7—figure supplement 1.** SPO-11-dependent CO recombination triggers the removal of REC-8 and COH-3/4 from complementary domains. Projected confocal micrographs show the distribution of COH-3/4 and REC-8 on diakinesis bivalents in wild-type worms and univalents of *spo-11* mutants. **(A)** COH-3/4 become substantially reduced or undetectable at the long arms of wild-type bivalents by diakinesis, but persists at high levels at short arms. In contrast, the AE protein HTP-3 is present at uniform levels at both long and short arms. **(B)** In contrast, REC-8 becomes reduced at short arms but persists at high levels at long arms. CO recombination fails in *spo-11* mutants, and homologs remain apart as discrete univalents. COH-3/4 **(A)** and REC-8 **(B)** both associate with univalents in diakinesis nuclei of *spo-11* mutants.

DOI: [10.7554/eLife.03467.019](https://doi.org/10.7554/eLife.03467.019)
