# Supplementary material for: Divergent kleisin subunits of cohesin specify mechanisms to tether and release meiotic chromosomes
Source: eLife journal article supplement (doi:10.7554/elife.03467), 2014-08-29
Supplement: supp [file elife_poa_e03467_Figure_3_figure_supplement_2.pdf › elife_poa_e03467_Figure_3_figure_supplement_2.pdf]

**Figure 3—figure supplement 2. Significance values for distances between LacI::GFP foci in diakinesis nuclei**

| <b>Genotype 1</b>         | <b>vs.</b> | <b>Genotype 2</b>                | <b><i>p</i> (Two-tailed Mann-Whitney)</b> |
|---------------------------|------------|----------------------------------|-------------------------------------------|
| <i>rec-8</i>              |            | <i>rec-8; coh-4 coh-3</i>        | <0.001                                    |
|                           |            | <i>spo-11 rec-8</i>              | <0.001                                    |
|                           |            | <i>irradiated spo-11 rec-8</i>   | 0.620                                     |
|                           |            | <i>atm-1; rec-8; atl-1</i>       | 0.001                                     |
|                           |            | <i>rec-8; chk-2</i>              | <0.001                                    |
|                           |            | <i>irradiated rec-8; chk-2</i>   | <0.001                                    |
| <i>rec-8; coh-4 coh-3</i> |            | <i>spo-11 rec-8</i>              | 0.646                                     |
|                           |            | <i>scc-1; rec-8; coh-4 coh-3</i> | 0.099                                     |
