# Supplementary material for: Divergent kleisin subunits of cohesin specify mechanisms to tether and release meiotic chromosomes
Source: eLife journal article supplement (doi:10.7554/elife.03467), 2014-08-29
Supplement: supp [file elife_poa_e03467_Figure_5_figure_supplement_3.pdf › elife_poa_e03467_Figure_5_figure_supplement_3.pdf]

**Figure 5—figure supplement 3. Significance values for distances between LacI::GFP foci in pachytene nuclei**

| Genotype 1                 | vs. | Genotype 2                       | <i>p</i> (Two-tailed Mann-Whitney) |
|----------------------------|-----|----------------------------------|------------------------------------|
| <i>rec-8</i>               |     | <i>spo-11 rec-8</i>              | 0.986                              |
|                            |     | <i>rec-8; coh-4 coh-3</i>        | <0.001                             |
|                            |     | <i>him-3 rec-8</i>               | <0.001                             |
|                            |     | <i>rec-8; syp-1</i>              | 0.012                              |
|                            |     | <i>spo-11 rec-8; syp-1</i>       | <0.001                             |
|                            |     | <i>atm-1; rec-8; atl-1</i>       | <0.002                             |
| <i>rec-8; coh-4 coh-3</i>  |     | <i>scc-1; rec-8; coh-4 coh-3</i> | <0.001                             |
|                            |     | <i>spo-11 rec-8; coh-4 coh-3</i> | <0.001                             |
|                            |     | <i>spo-11 rec-8</i>              | <0.001                             |
| <i>him-3 rec-8</i>         |     | <i>him-3 spo-11 rec-8</i>        | 0.861                              |
| <i>rec-8 syp-1</i>         |     | <i>spo-11 rec-8; syp-1</i>       | <0.001                             |
| <i>atm-1; rec-8; atl-1</i> |     | <i>atm-1; coh-4 coh-3; atl-1</i> | <0.001                             |
