# Supplementary figures and images for: Divergent kleisin subunits of cohesin specify mechanisms to tether and release meiotic chromosomes
Source: eLife journal article supplement (doi:10.7554/elife.03467), 2014-08-29

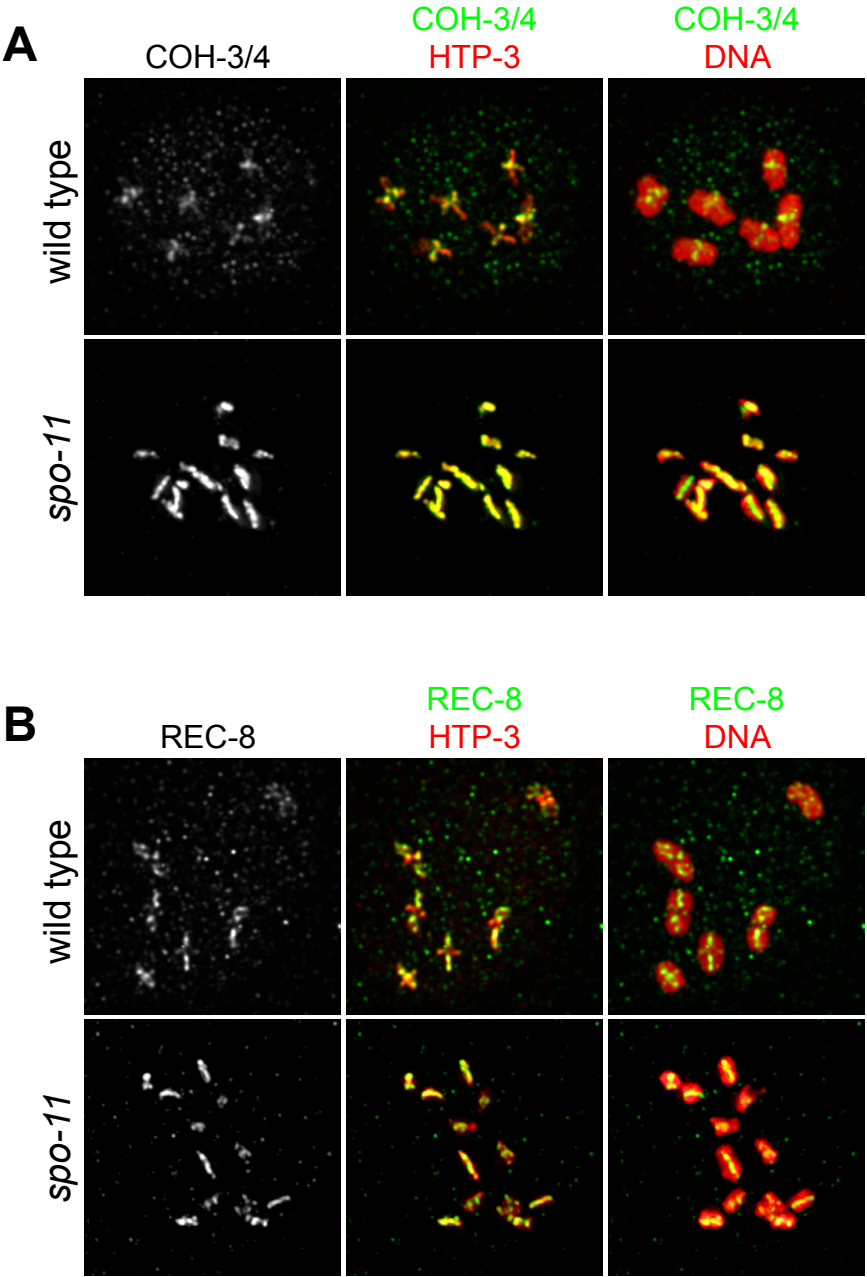

Supplement: supp [file elife_poa_e03467_FIgure_7_figure_supplement_1.pdf › elife_poa_e03467_FIgure_7_figure_supplement_1.pdf]

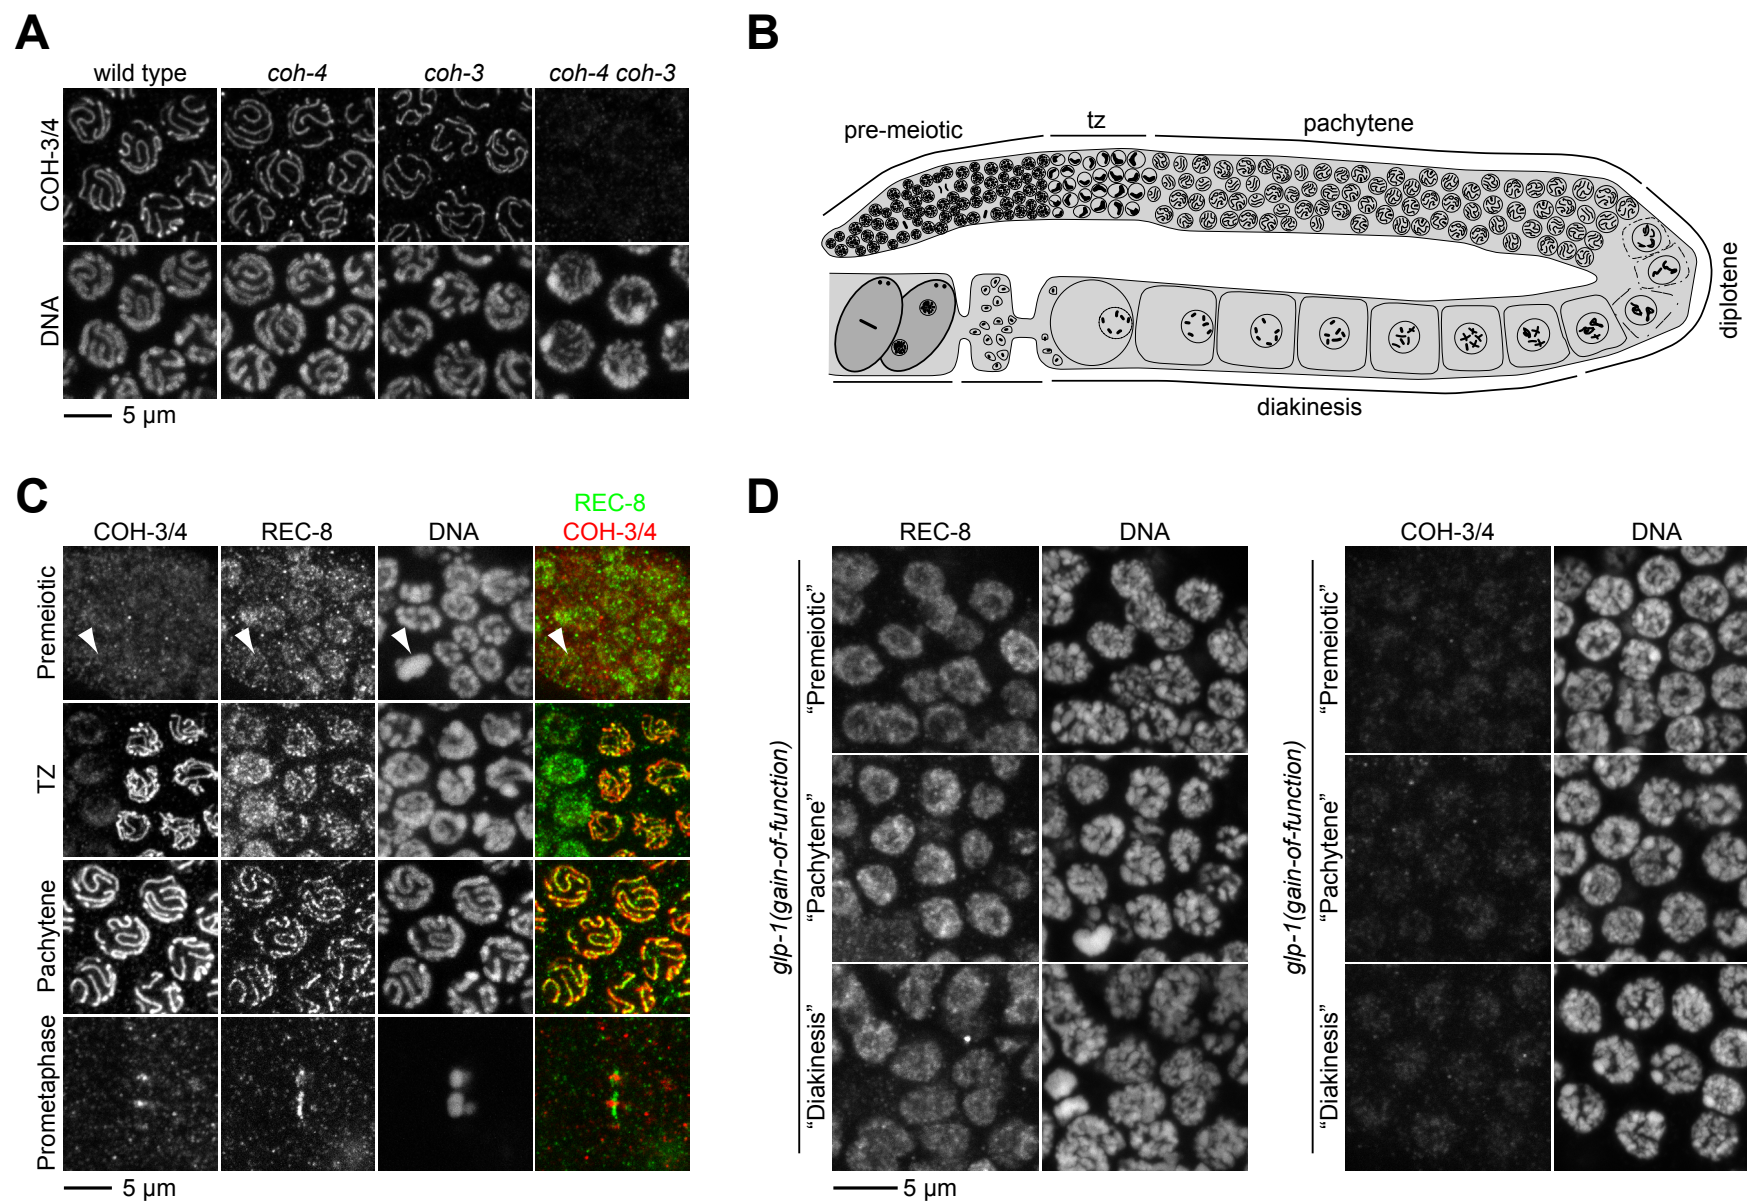

Supplement: supp [file elife_poa_e03467_Figure_1_figure_supplement_1.pdf › elife_poa_e03467_Figure_1_figure_supplement_1.pdf]

Figure 3—figure supplement 1

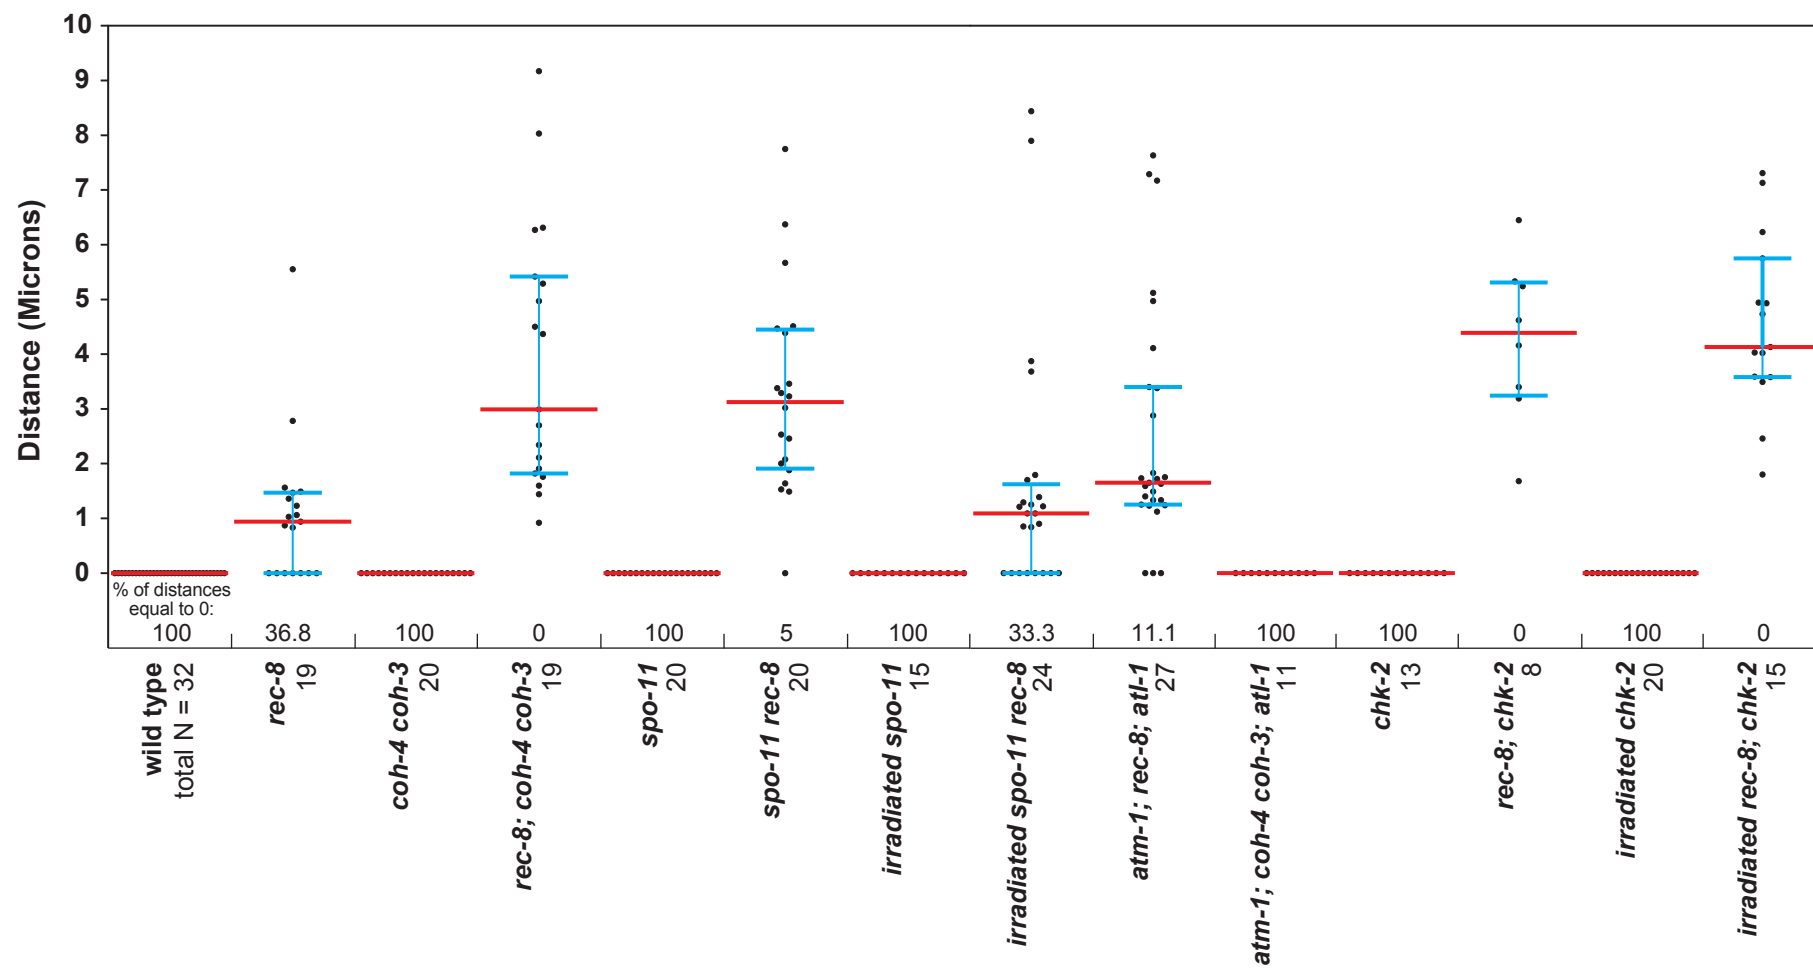

Supplement: supp [file elife_poa_e03467_Figure_3_figure_supplement_1.pdf › elife_poa_e03467_Figure_3_figure_supplement_1.pdf]

Figure 3—figure supplement 3

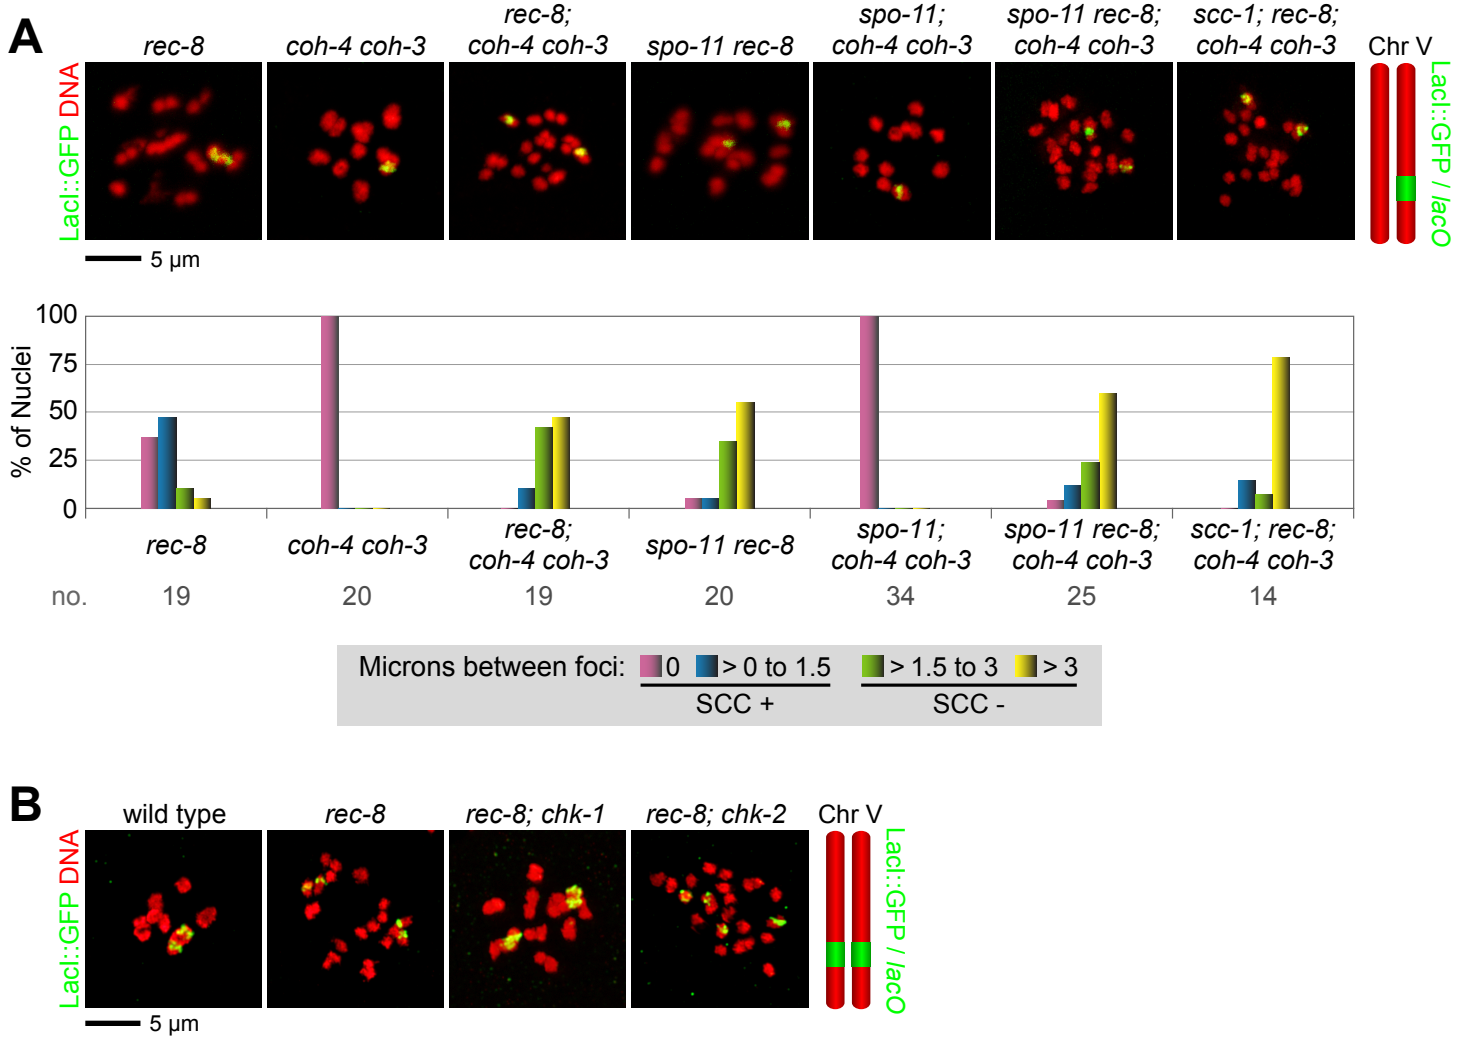

Supplement: supp [file elife_poa_e03467_Figure_3_figure_supplement_3.pdf › elife_poa_e03467_Figure_3_figure_supplement_3.pdf]

Figure 4—figure supplement 1

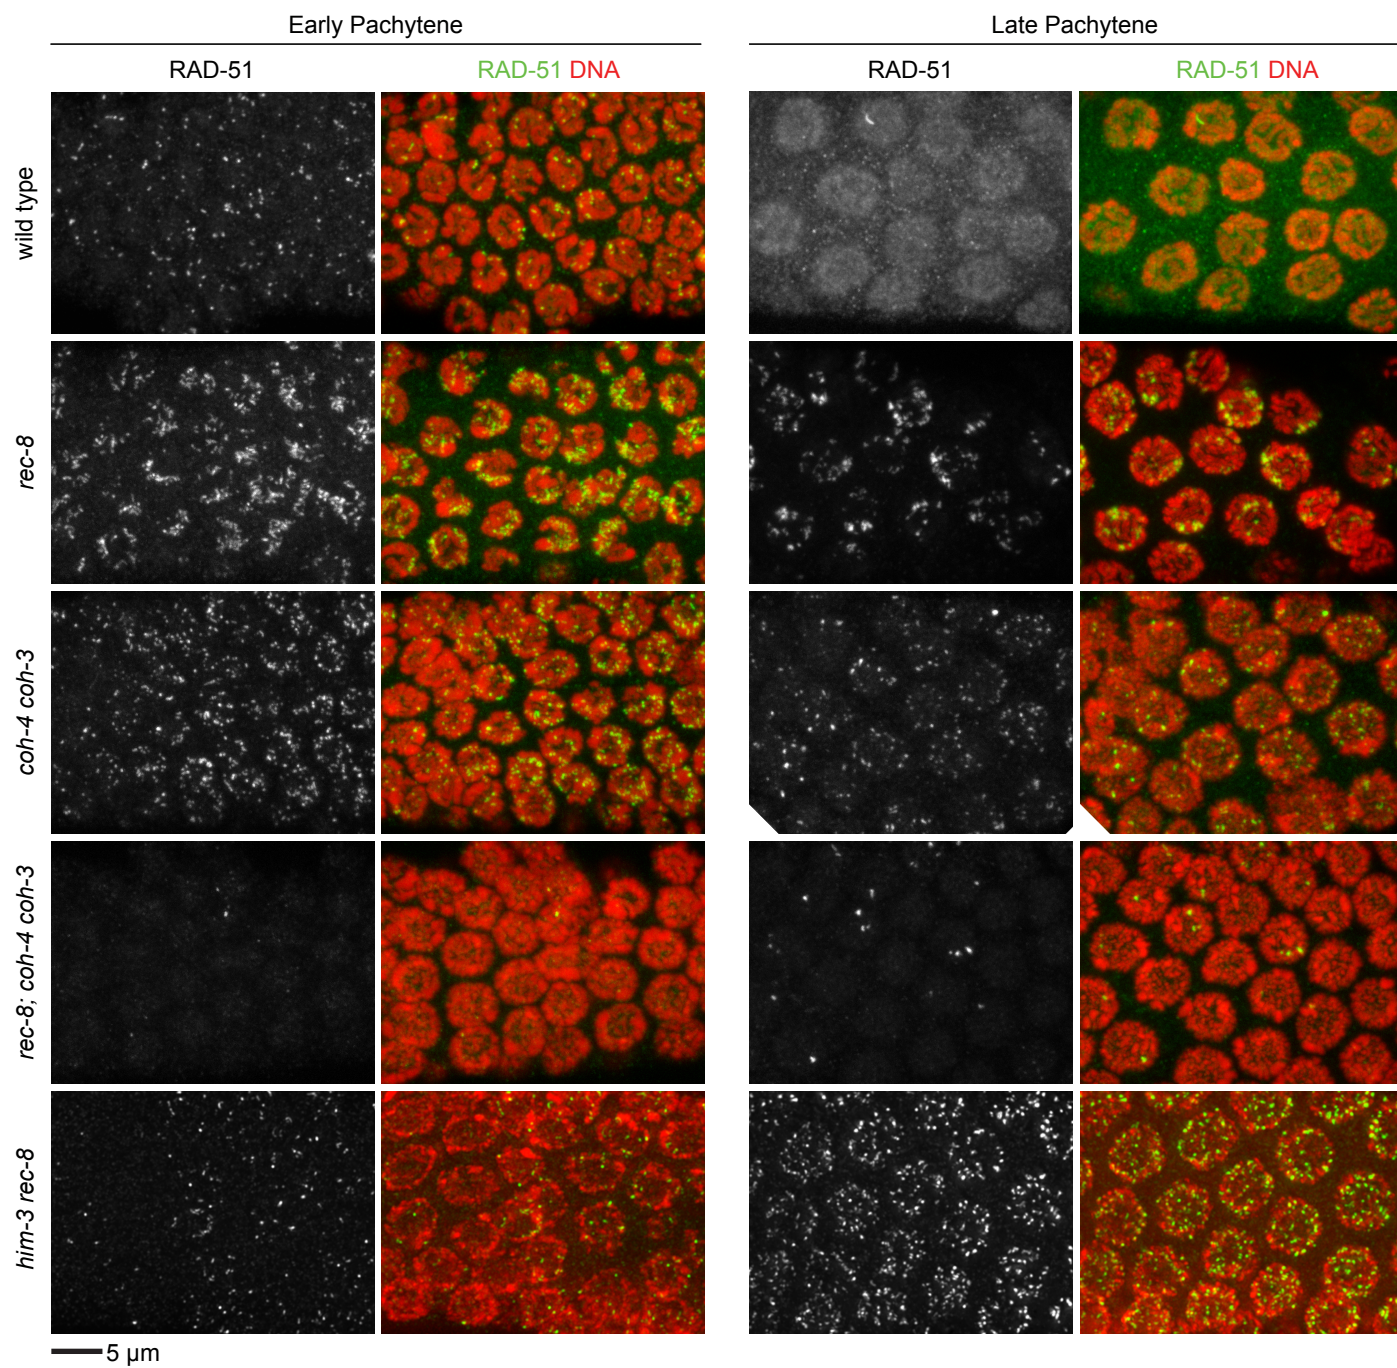

Supplement: supp [file elife_poa_e03467_Figure_4_figure_supplement_1.pdf › elife_poa_e03467_Figure_4_figure_supplement_1.pdf]

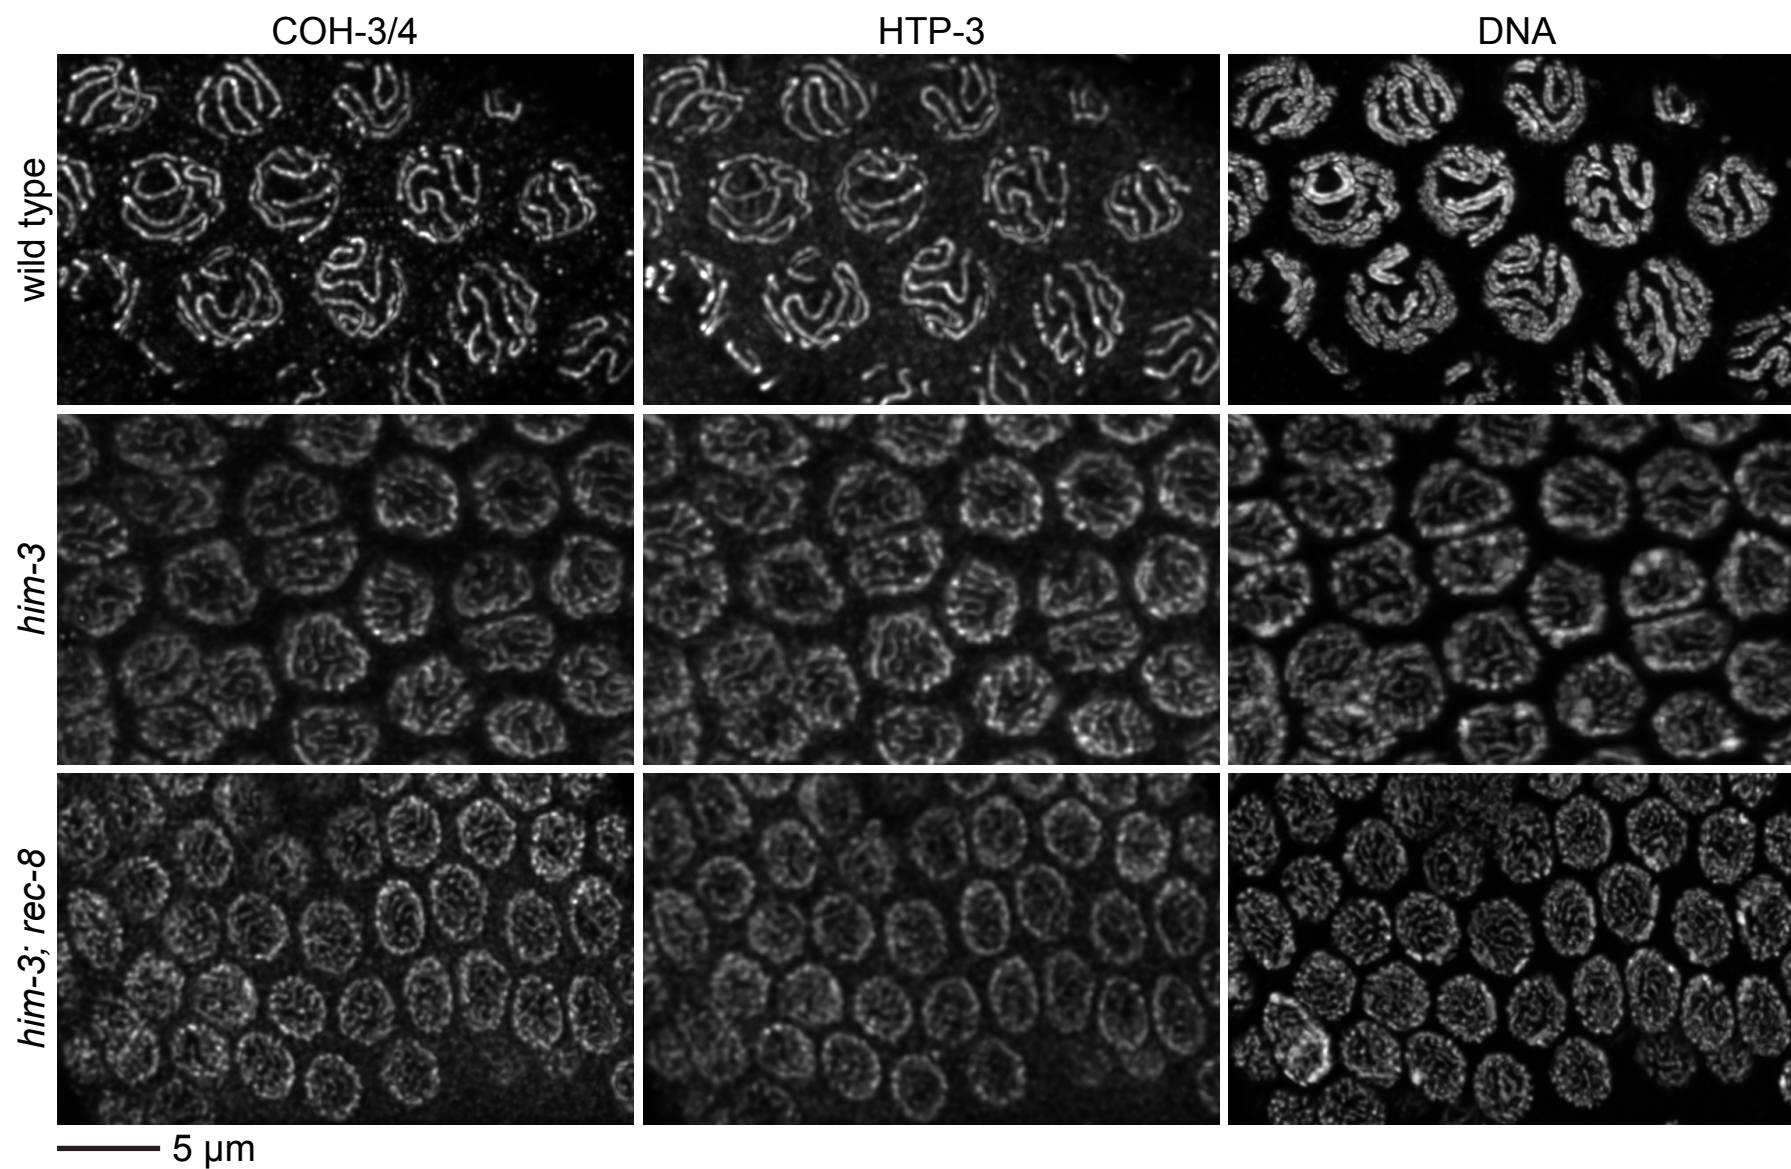

Supplement: supp [file elife_poa_e03467_Figure_4_figure_supplement_2.pdf › elife_poa_e03467_Figure_4_figure_supplement_2.pdf]

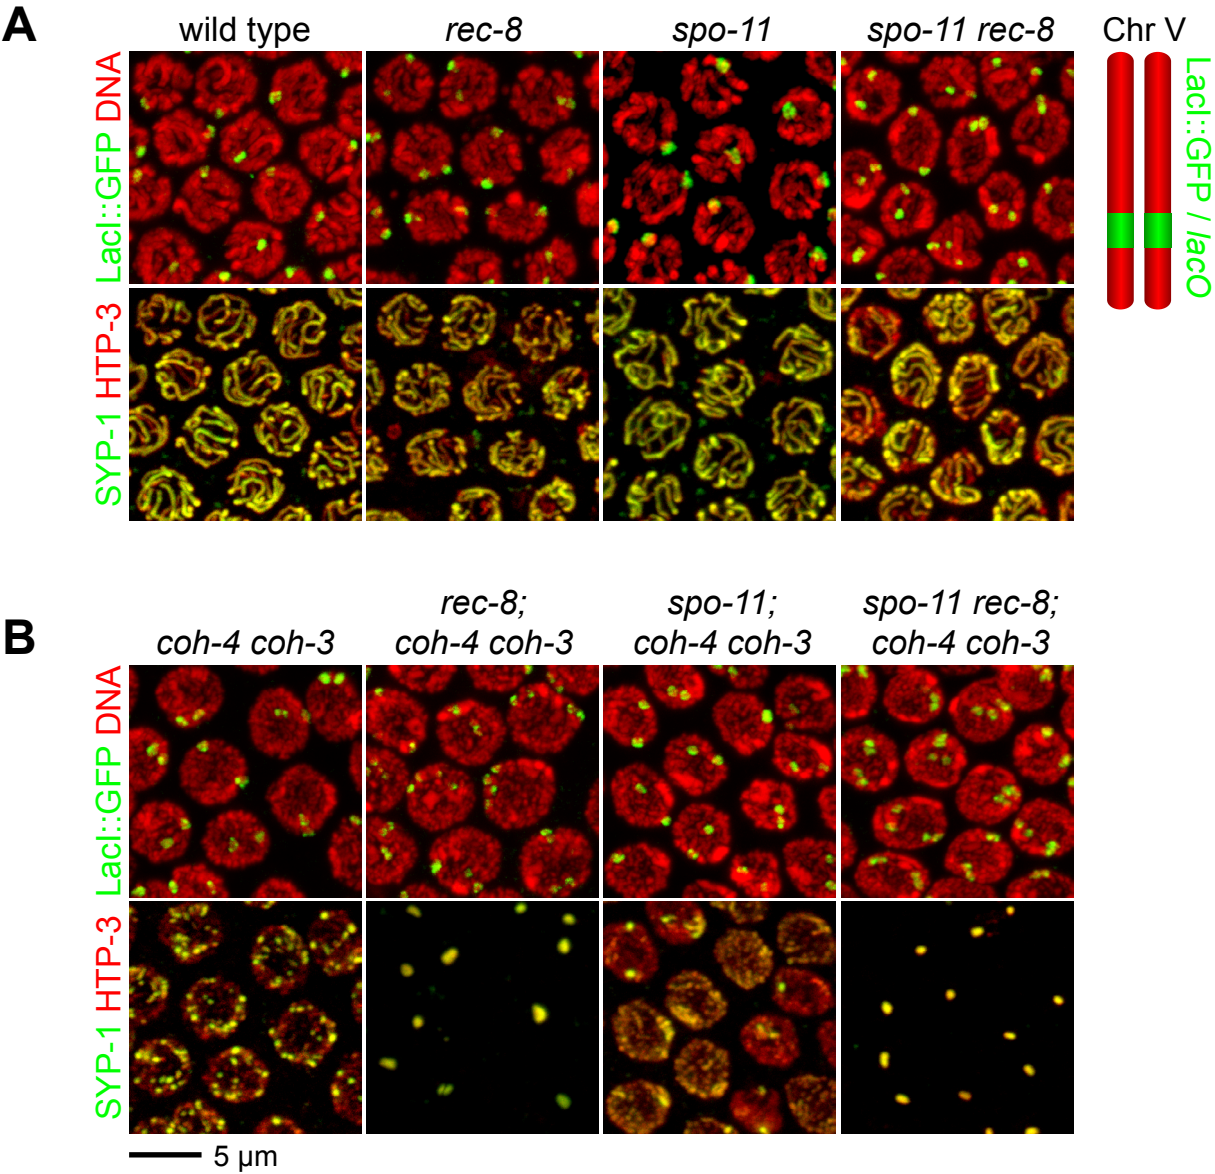

Supplement: supp [file elife_poa_e03467_Figure_5_figure_supplement_1.pdf › elife_poa_e03467_Figure_5_figure_supplement_1.pdf]

Figure 5—figure supplement 2

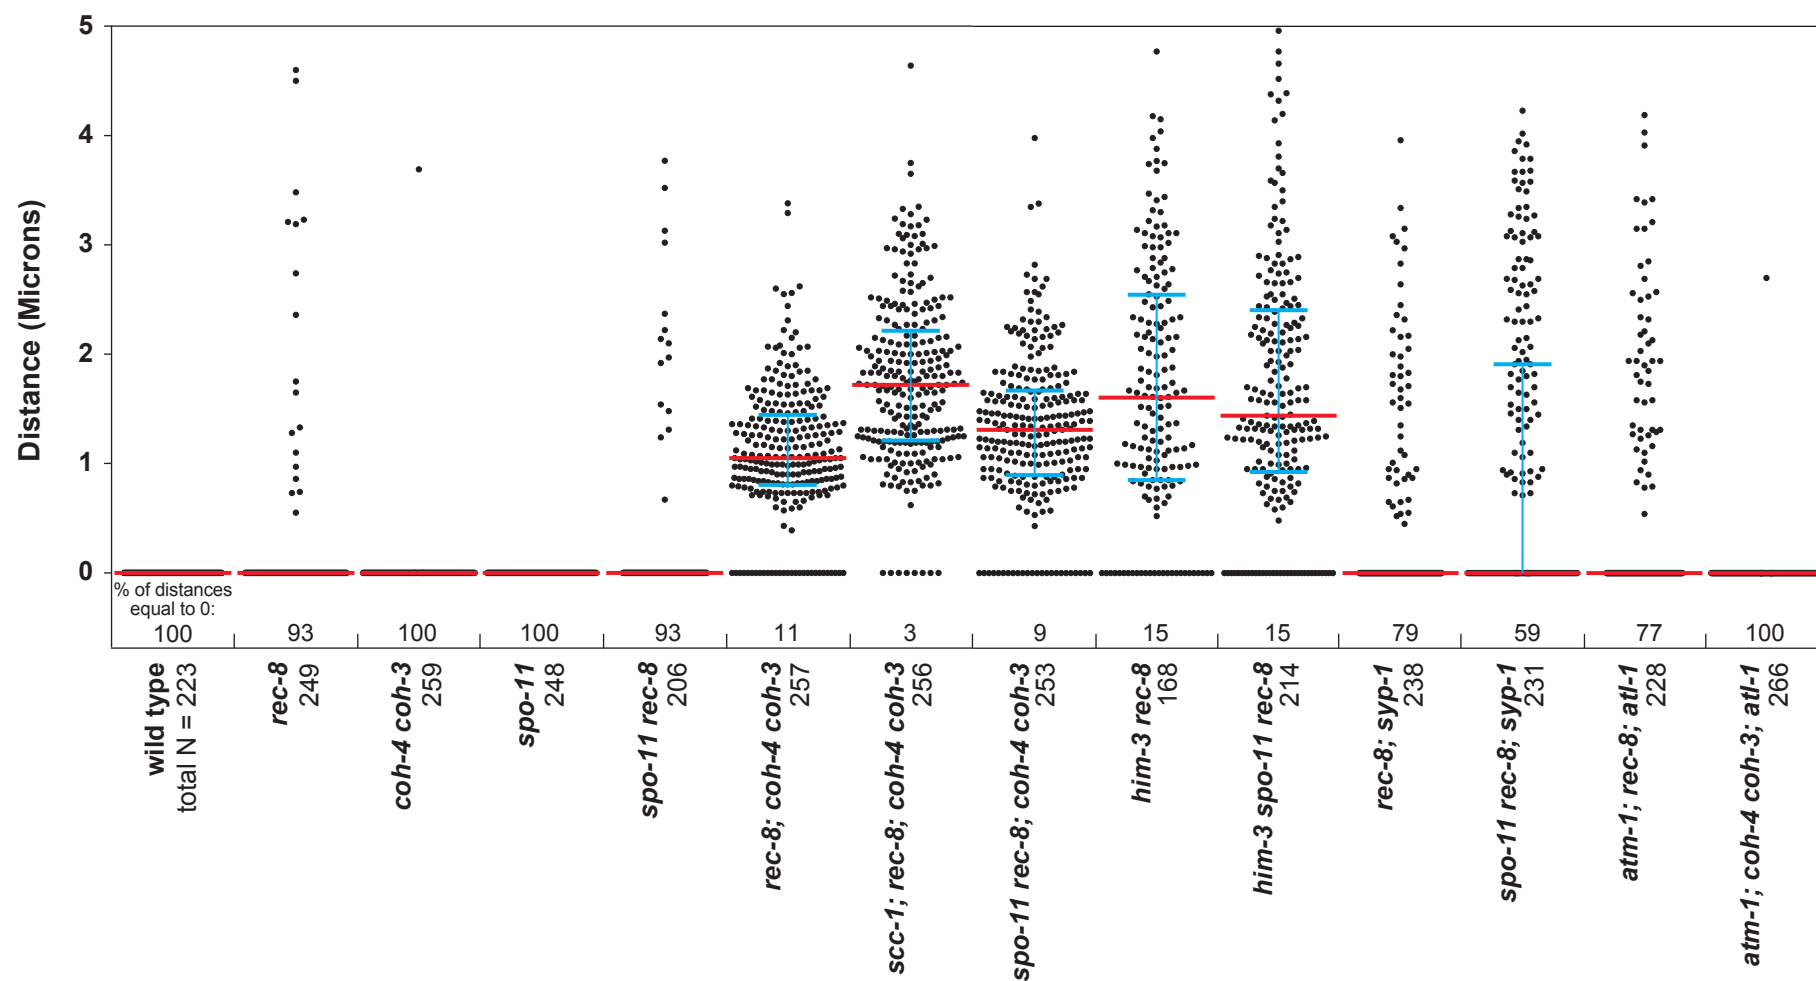

Supplement: supp [file elife_poa_e03467_Figure_5_figure_supplement_2.pdf › elife_poa_e03467_Figure_5_figure_supplement_2.pdf]
